# Supplementary material for: Sequence-based drug design as a concept in computational drug design
Source: PubMed Central journal article supplement (PMC10349078; doi:10.1038/s41467-023-39856-w), 2023-07-14
Supplement: 41467_2023_39856_MOESM1_ESM.pdf [file 41467_2023_39856_MOESM1_ESM.pdf]

## **Supplementary Information for**

### **Sequence-based drug design as a concept in computational drug design**

Lifan Chen, Zisheng Fan, Jie Chang, Ruirui Yang, Hui Hou, Hao Guo, Yinghui Zhang, Tianbiao Yang, Chenmao Zhou, Qibang Sui, Zhengyang Chen, Chen Zheng, Xinyue Hao, Keke Zhang, Rongrong Cui, Zehong Zhang, Hudson Ma, Yiluan Ding, Naixia Zhang, Xiaojie Lu, Xiaomin Luo, Hualiang Jiang, Sulin Zhang, Mingyue Zheng.

Correspondence to: myzheng@simm.ac.cn (Mingyue Zheng), slzhang@simm.ac.cn (Sulin Zhang)

Supplementary Fig. 1~24

Supplementary Tab. 1~18

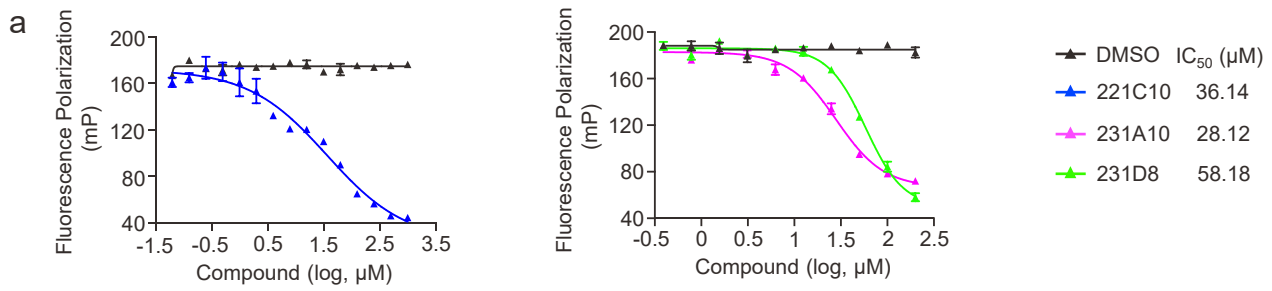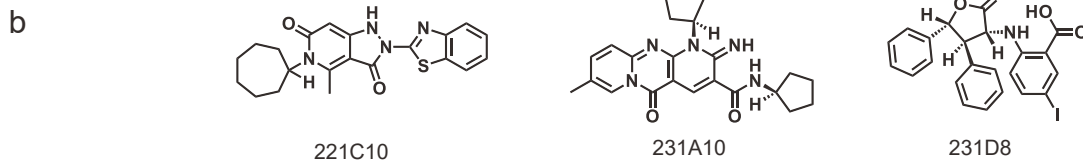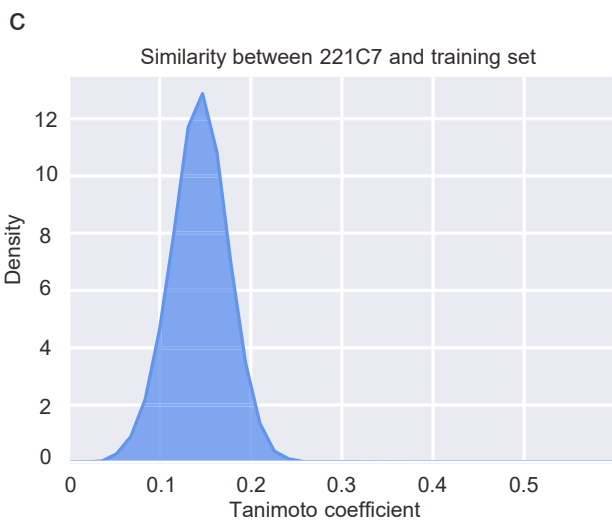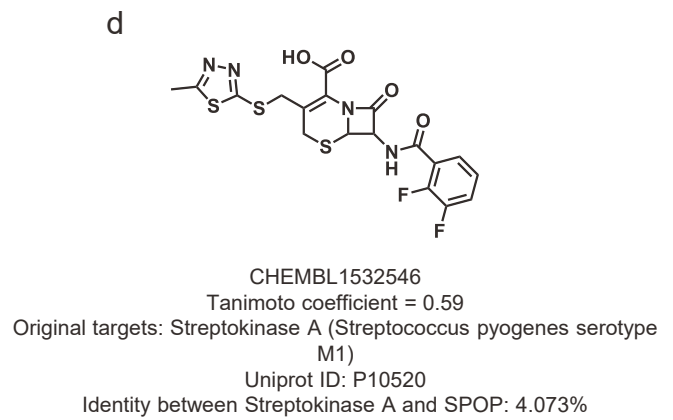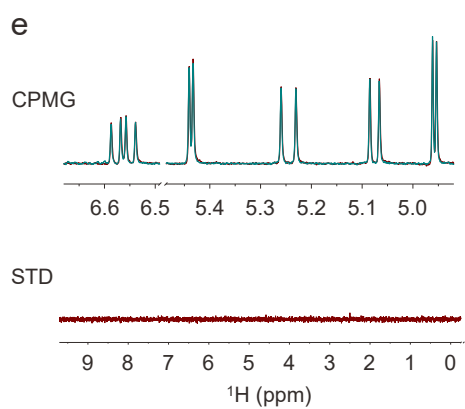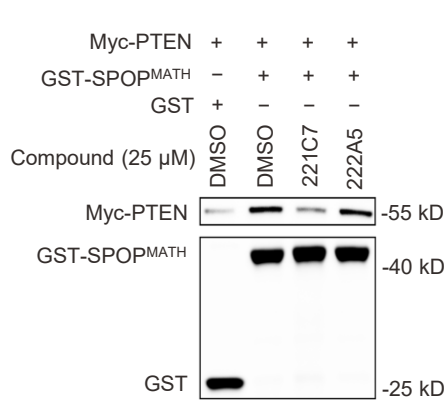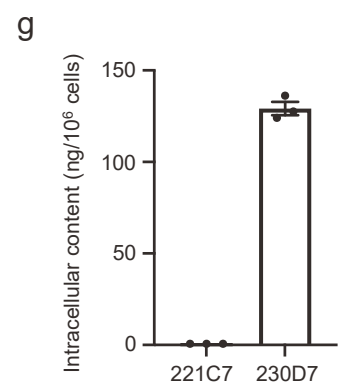

**Supplementary Fig. 1. Supplementary data for Fig. 4.** **a**, The FP assay of three initial hits predicted by TransformerCPI2.0. Error bars represent mean  $\pm$  SEM of two independent experiments. **b**, Chemical structures of the three other initial hits predicted by TransformerCPI2.0. **c**, Tanimoto similarity between 221C7 and training set compounds calculated by ECFP fingerprints. The most compounds in the training set have low similarity coefficient with 221C7. **d**, We investigated the most similar compounds in the training set, which has Tanimoto coefficient of 0.59. The original target of this compound is Streptokinase A from Streptococcus, and the sequence identity between Streptokinase A and SPOP is 4.073%. **e**, CPMG NMR spectra for 222A5 (red), 222A5 in the presence of 5  $\mu$ M SPOP<sup>MATH</sup> (green). The STD spectrum for 222A5 is recorded in the presence of 5  $\mu$ M SPOP<sup>MATH</sup>. **f**, The ability of 221C7 and 222A5 to disrupt the binding of SPOP<sup>MATH</sup> to PTEN was determined by the *in vitro* pull-down assay. This experiment is repeated three times independently with similar results. **g**, Cell permeability measurements of 221C7 and 230D7. After treating 786-O cells with 20  $\mu$ M of the indicated compounds for 6 hours, the intracellular content of 221C7 and 230D7 were measured by LC-MS/MS. Error bars represent mean  $\pm$  SEM of three independent experiments. Source data are provided as a Source Data file.

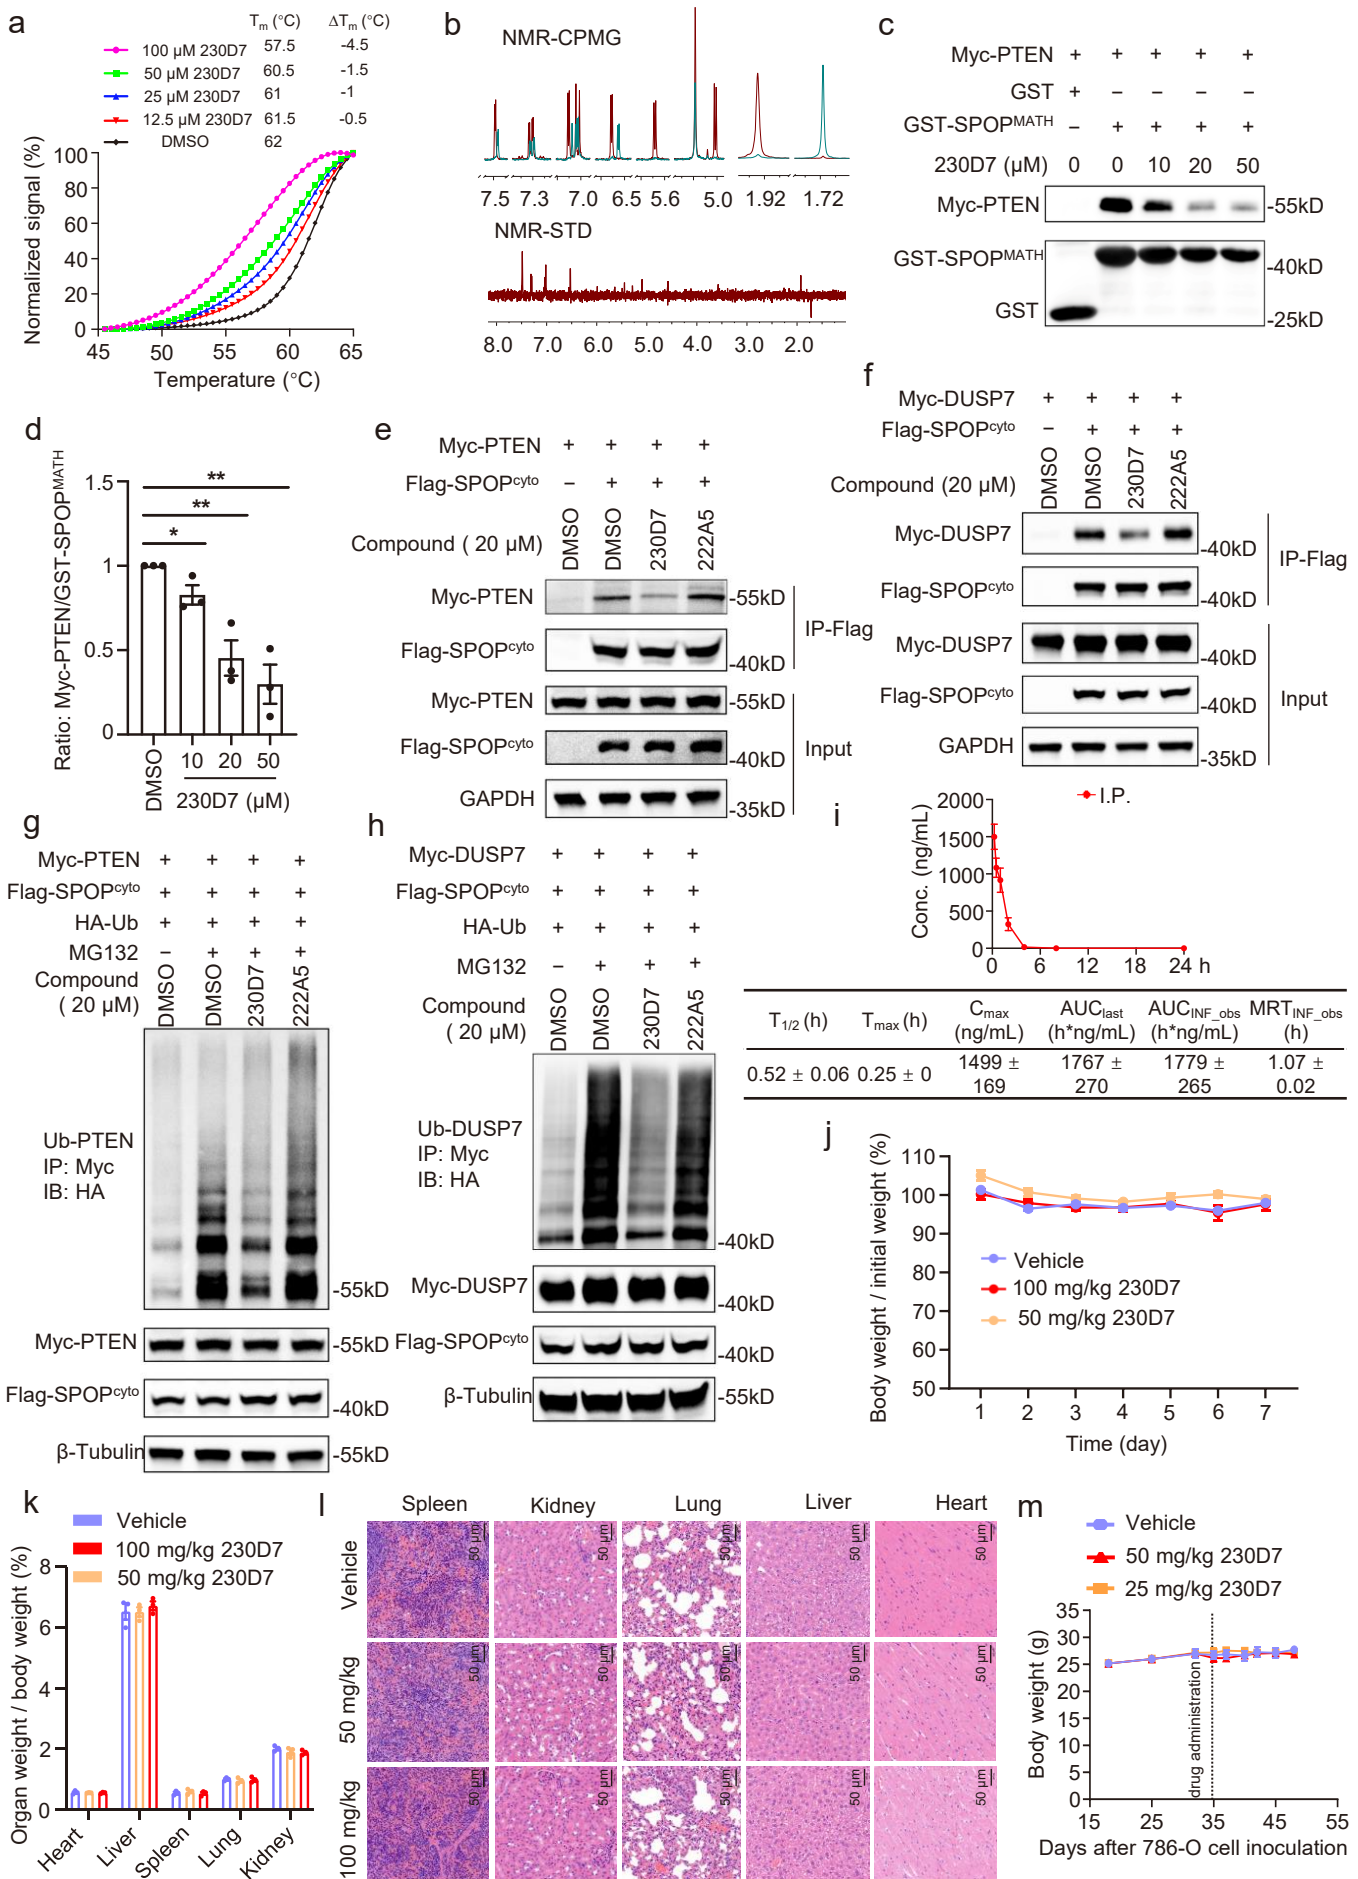

**Supplementary Fig. 2. Supplementary data for Fig. 5.** **a**, Thermostability of SPOP<sup>MATH</sup> (5  $\mu$ M) treated with different concentrations of 230D7. The thermal stability of SPOP<sup>MATH</sup> was quantified by the  $\Delta T_m$ . **b**, NMR measurement of direct binding between 230D7 and SPOP<sup>MATH</sup>. CPMG NMR spectra for 230D7 (red), 230D7 in the presence of 5  $\mu$ M SPOP<sup>MATH</sup> (green). The STD spectrum for 230D7 is recorded in the presence of 5  $\mu$ M SPOP<sup>MATH</sup>. **c**, 230D7 disrupts protein binding between SPOP<sup>MATH</sup> and PTEN, as measured by *in vitro* pull-down assay. This experiment is repeated three times independently with similar results. **d**, The gray values of Myc-PTEN and GST-SPOP<sup>MATH</sup> protein bands in (c) were quantified, and the ratio of Myc-PTEN/GST-SPOP<sup>MATH</sup> were calculated. Error bars represent mean  $\pm$  SEM of three independent experiments. *P* values were evaluated using 2-tailed unpaired t-test. \**P* < 0.05, \*\**P* < 0.01. (10  $\mu$ M 230D7 vs. DMSO, *P* = 0.0389; 20  $\mu$ M 230D7 vs. DMSO, *P* = 0.0065; 50  $\mu$ M 230D7 vs. DMSO, *P* = 0.0038.) **e-f**, Inhibitory activities of 230D7 and negative control compound 222A5 on the binding of SPOP-PTEN (**e**) or SPOP-DUSP7 (**f**) in the coimmunoprecipitation experiments. These experiments are repeated twice independently with similar results. **g-h**, Effects of 230D7 and negative control compound 222A5 on the ubiquitination level of PTEN (**g**) or DUSP7 (**h**) in the *in vivo* ubiquitination experiments. These experiments are repeated twice independently with similar results. **i**, Concentrations (ng/mL) of 230D7 in BALB/c mice plasma after i.p. administration of 10 mg/kg 230D7. The Pharmacokinetic parameters were summarized in the table. Error bars represent mean  $\pm$  SEM of three biologically independent animals. **j**, The body weight of BALB/c mice treated with different dosages of 230D7 daily for 7 days. Error bars represent mean  $\pm$  SEM of three biologically independent animals. **k**, The weight of different organs (heart, liver, spleen, lung, and kidney) of BALB/c mice treated with different dosages of 230D7 daily for 7 day. Error bars represent mean  $\pm$  SEM of three biologically independent animals. **l**, Representative histological morphology of H&E-stained tissue sections of BALB/c mice in 230D7-treated or vehicle control groups. **m**, The body weight of NSG mice were measured during the entire pharmacodynamics study of 230D7. Error bars represent mean  $\pm$  SEM of seven biologically independent animals. Source data are provided as a Source Data file.

**230D7**

413 Assays Tested  
0 Interactions Mapped

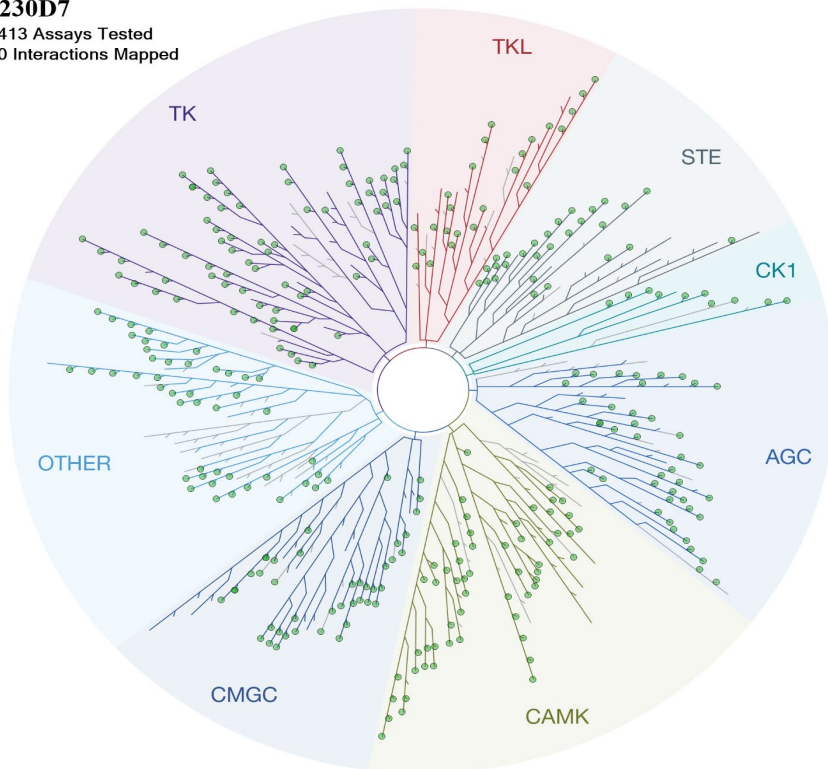

**Percent Control**

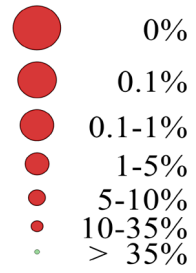

ATYPICAL

MUTANT

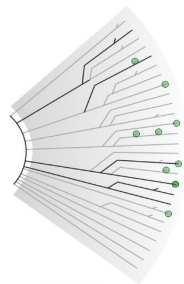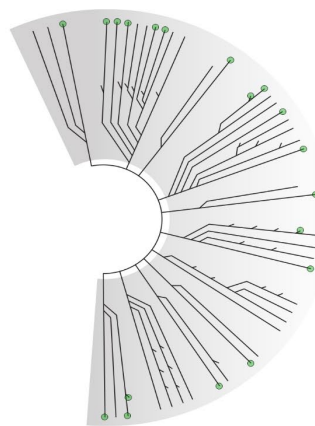

LIPID

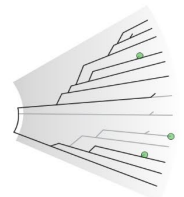

PATHOGEN

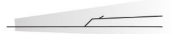

**Supplementary Fig. 3. Kinome profiling of 230D7.** 230D7 (10  $\mu$ M) was submitted for a KinaseProfiler (eurofins) to quantify interactions with 413 human wild-type/mutant kinases. The results are displayed as a TREESPOT interaction map. Image generated using TREEspot™ Software Tool and reprinted with permission from KINOMEscan®, a division of DiscoverX Corporation, © DISCOVERX CORPORATION 2010. Source data are provided as a Source Data file.

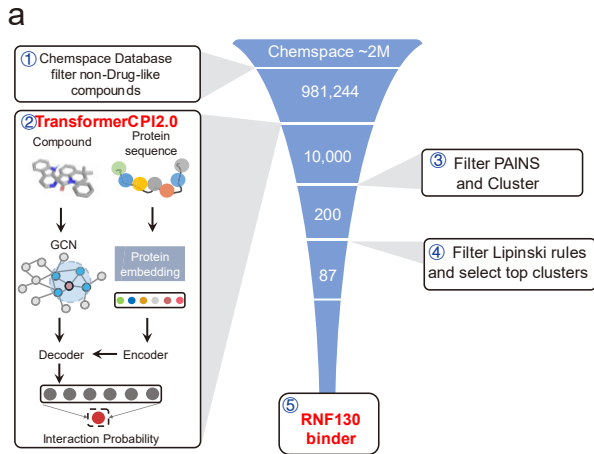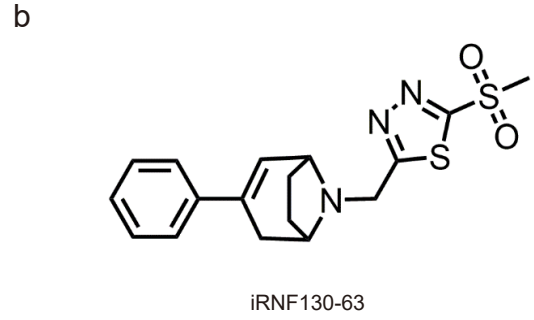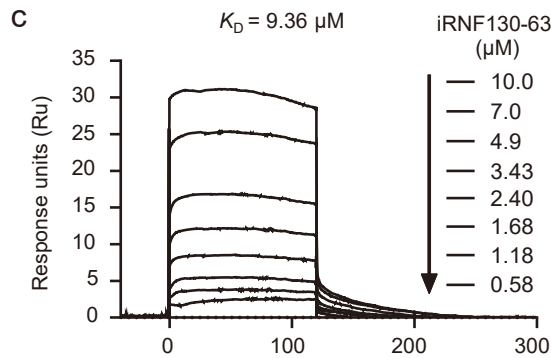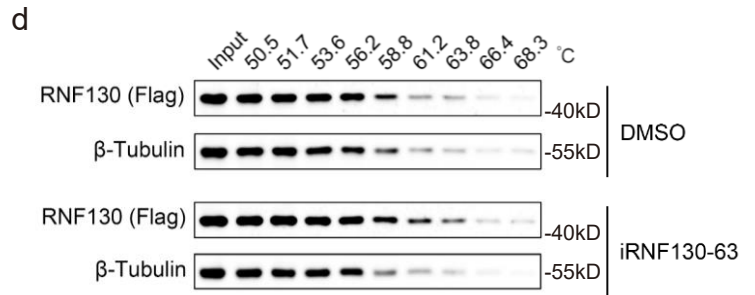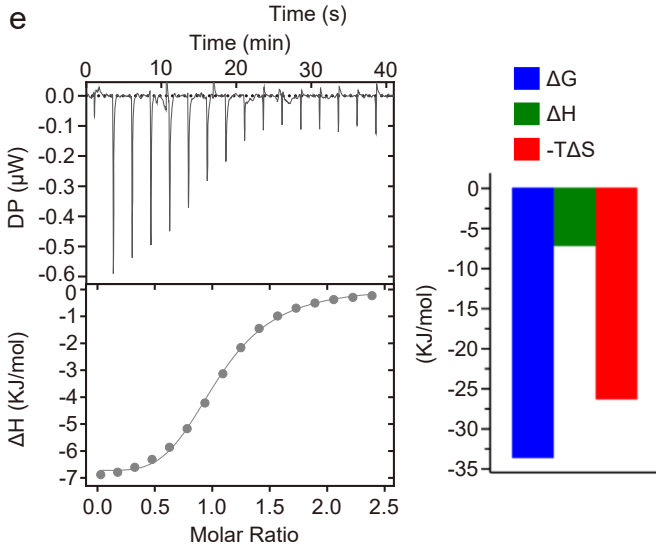

| Ligand      | $K_D$ ( $\mu\text{M}$ ) | $\Delta\text{G}$ (KJ/mol) | $\Delta\text{H}$ (KJ/mol) | $-\text{T}\Delta\text{S}$ (KJ/mol) | N (sites) |
|-------------|-------------------------|---------------------------|---------------------------|------------------------------------|-----------|
| iRNF1 30-63 | 1.23                    | -33.80                    | -7.31                     | -26.40                             | 1.01      |

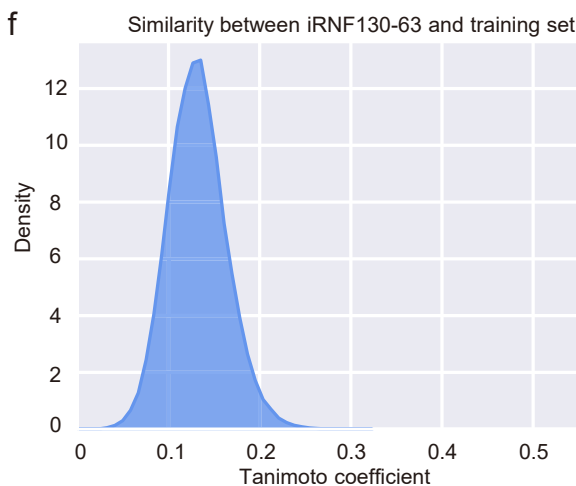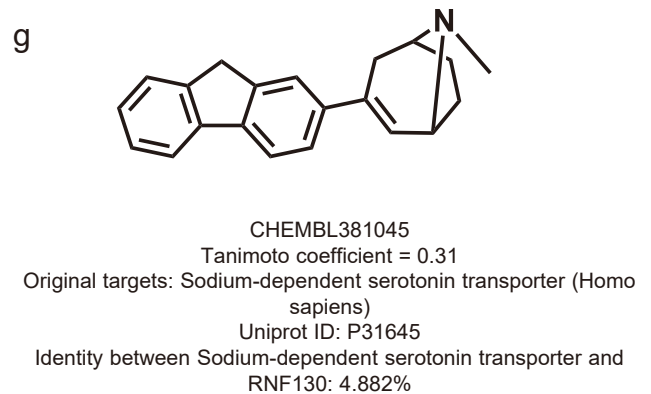



**Supplementary Fig. 4. Discovering the chemical binder of RNF130.** **a**, The virtual screening procedure of RNF130. **b**, Chemical structure of iRNF130-63. **c**, Surface plasmon resonance analysis examining the direct binding affinity of iRNF130-63 to RNF130. Graphs of equilibrium unit responses versus iRNF130-63 concentrations are plotted. **d**, Representative western blots for the effect of 50  $\mu$ M iRNF130-63 on the thermal stabilization of RNF130 protein. Cellular thermal shift assay (CETSA) was assayed in 293T cell lysate. These experiments are repeated twice independently with similar results. **e**, Binding of iRNF130-63 with RNF130 was characterized by isothermal titration calorimetry (ITC). Thermodynamic parameters of iRNF130-63 measured by ITC are shown in the table. **f**, Tanimoto similarity between iRNF130-63 and training set compounds calculated by ECFP fingerprints. The most compounds in the training set have low similarity coefficient with iRNF130-63. **g**, We investigated the most similar compounds in the training set, which has Tanimoto coefficient of 0.31. The original target of this compound is Sodium-dependent serotonin transporter from Homo sapiens, and the sequence identity between Sodium-dependent serotonin transporter and RNF130 is 4.882%. Source data are provided as a Source Data file.

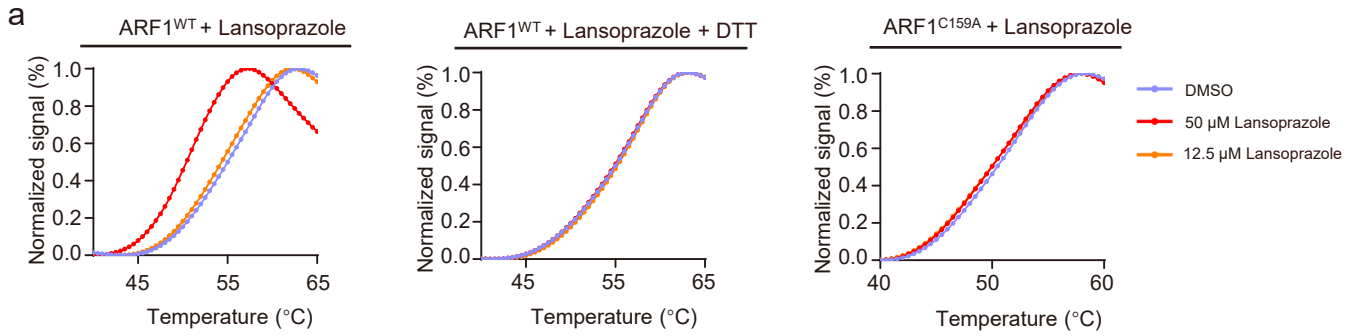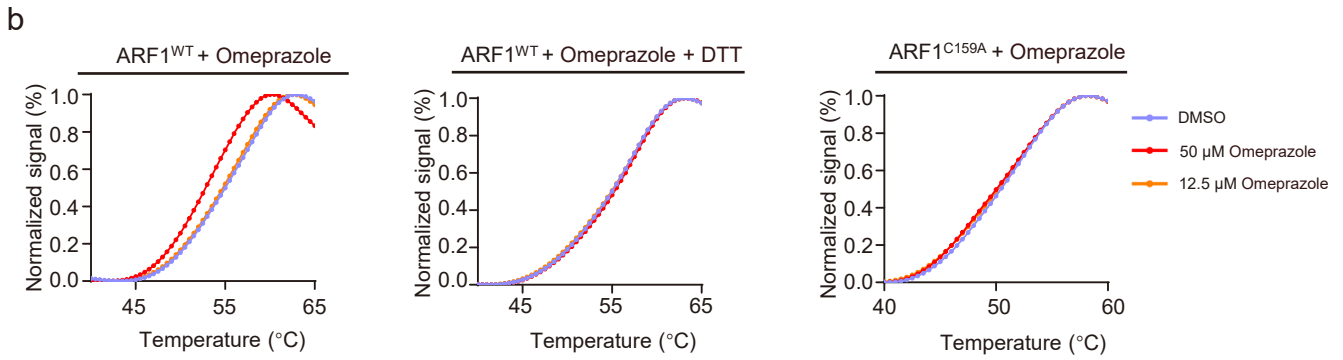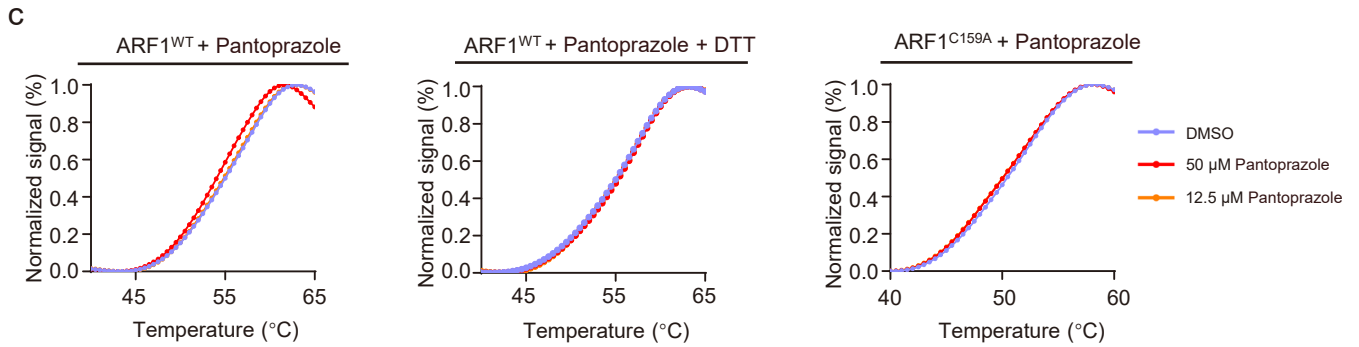

**d**

|      |             |            |            |             |            |
|------|-------------|------------|------------|-------------|------------|
|      | 10          | 20         | 30         | 40          | 50         |
|      | MGNIFANLFK  | GLFGKKEMRI | LMVGLDAAGK | TTILYKCLKLG | EIVTTIPTIG |
|      | 60          | 70         | 80         | 90          | 100        |
|      | FNVETVEYKN  | ISFTVWDVGG | QDKIRPLWRH | YFQNTQGLIF  | VVDSNDRERV |
| ARF1 | 110         | 120        | 130        | 140         | 150        |
|      | NEAREELMRM  | LAEDELRDAV | LLVFANKQDL | PNAMNAAEIT  | DKLGLHSLRH |
|      | 160         | 170        | 180        |             |            |
|      | RNWWYIQATCA | TSGDGLYEGL | DWLSNQLRNQ | K           |            |

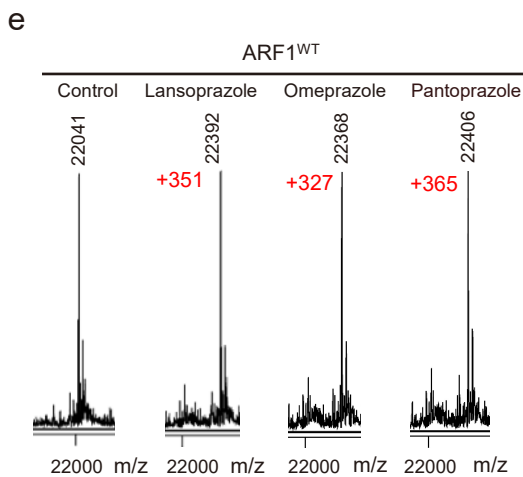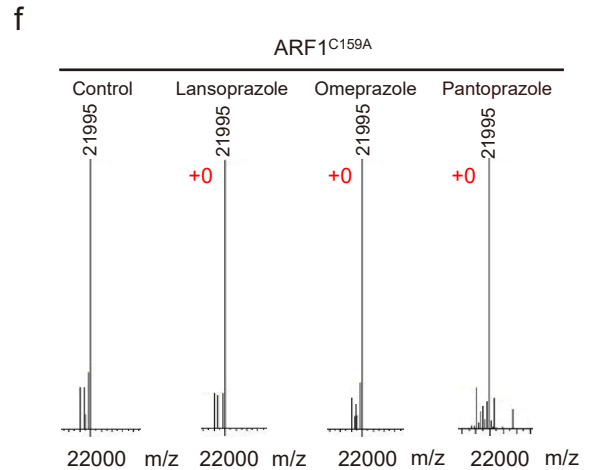

**Supplementary Fig. 5. Supplementary data for Fig 6. a**, PTS assay of lansoprazole (12.5 or 50  $\mu\text{M}$ ) + ARF1<sup>WT</sup> (2.5  $\mu\text{M}$ ) (left panel); PTS assay of lansoprazole (12.5 or 50  $\mu\text{M}$ ) + ARF1<sup>WT</sup> (2.5  $\mu\text{M}$ ) + DTT (middle panel); PTS assay of ARF1<sup>C159A</sup> (2.5  $\mu\text{M}$ ) + lansoprazole (12.5 or 50  $\mu\text{M}$ ) (right panel). **b**, PTS assay of omeprazole (12.5 or 50  $\mu\text{M}$ ) + ARF1<sup>WT</sup> (2.5  $\mu\text{M}$ ) (left panel); PTS assay of omeprazole (12.5 or 50  $\mu\text{M}$ ) + ARF1<sup>WT</sup> (2.5  $\mu\text{M}$ ) + DTT (middle panel); PTS assay of ARF1<sup>C159A</sup> (2.5  $\mu\text{M}$ ) + omeprazole (12.5 or 50  $\mu\text{M}$ ) (right panel). **c**, PTS assay of pantoprazole (12.5 or 50  $\mu\text{M}$ ) + ARF1<sup>WT</sup> (2.5  $\mu\text{M}$ ) (left panel); PTS assay of pantoprazole (12.5 or 50  $\mu\text{M}$ ) + ARF1<sup>WT</sup> (2.5  $\mu\text{M}$ ) + DTT (middle panel); PTS assay of ARF1<sup>C159A</sup> (2.5  $\mu\text{M}$ ) + pantoprazole (12.5 or 50  $\mu\text{M}$ ) (right panel). **d**, Amino acid sequence of ARF1, and C159 (marked red) is the only cysteine residue. **e**, Deconvoluted electrospray ionization mass spectra of ARF1<sup>WT</sup> in the presence of lansoprazole or omeprazole or pantoprazole. **f**, Deconvoluted electrospray ionization mass spectra of ARF1<sup>C159A</sup> in the presence of lansoprazole or omeprazole or pantoprazole. Source data are provided as a Source Data file.

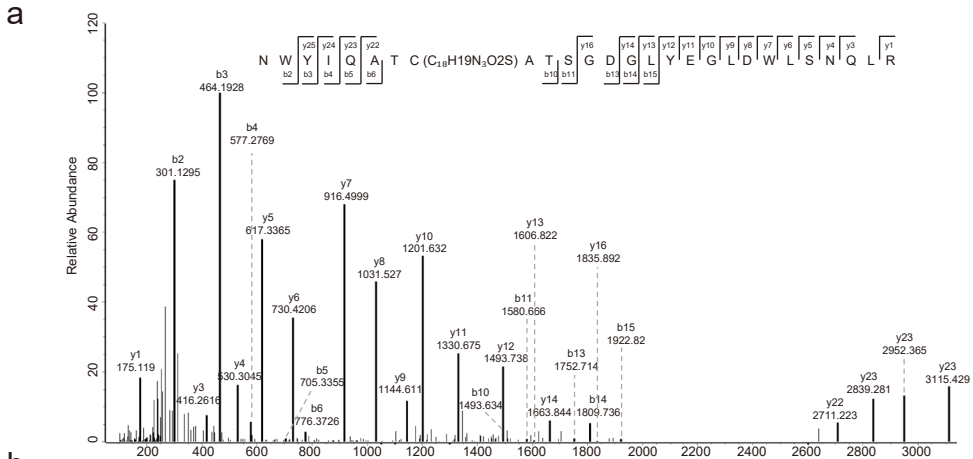

Rabeprazole

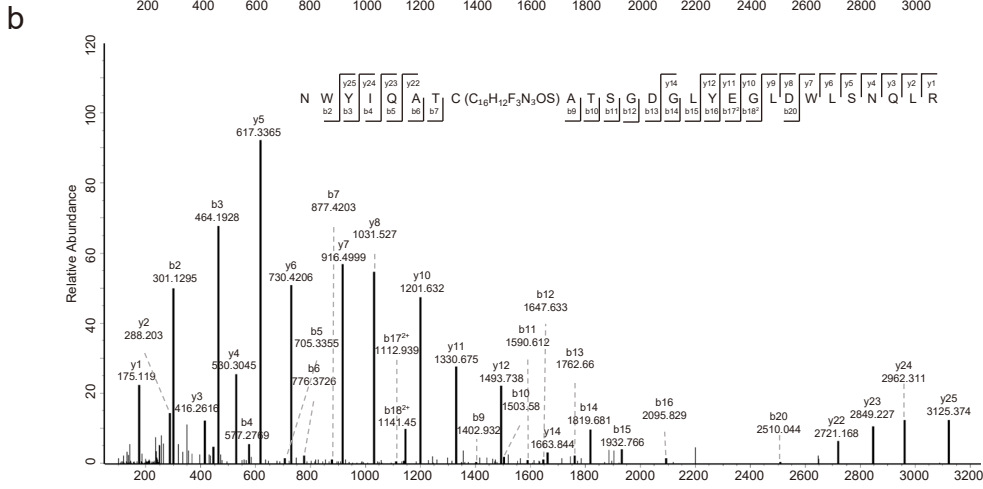

Lansoprazole

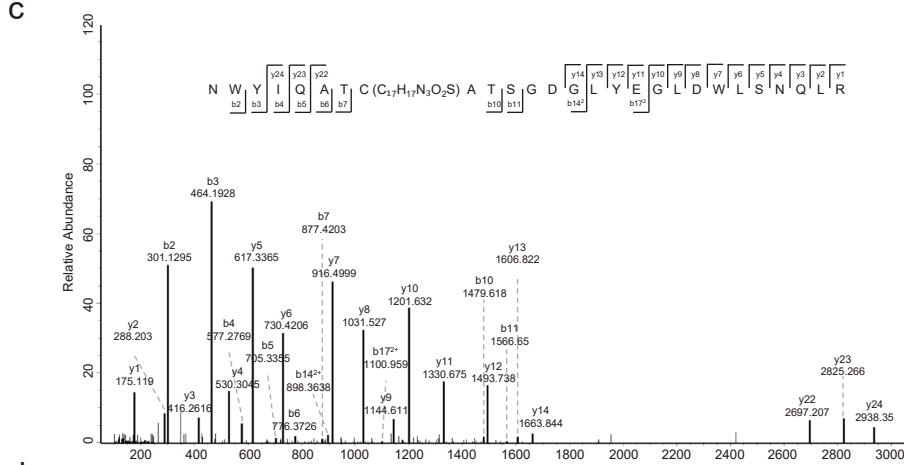

Omeprazole

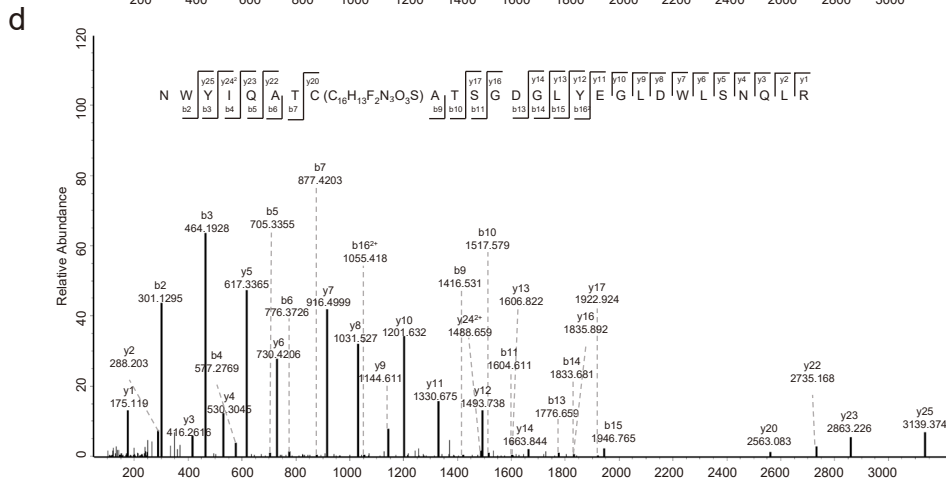

Pantoprazole

**Supplementary Fig. 6. Two-dimensional mass spectra of rabeprazole, lansoprazole, omeprazole, and pantoprazole. a~d, Q-Exactive tandem mass spectra results showed the modified peptide of ARF1, demonstrating that ARF1 was covalently modified by, rabeprazole (a), lansoprazole (b), omeprazole (c) and pantoprazole (d) at cysteine 159.**

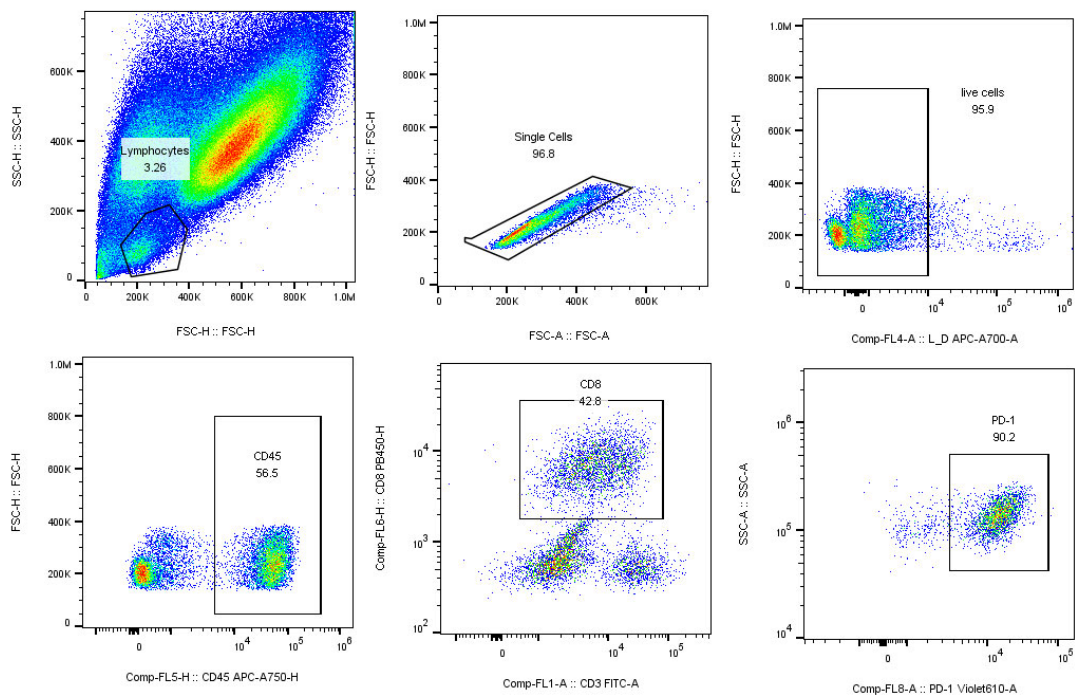

**Supplementary Fig. 7.** Flow cytometry gating strategies.

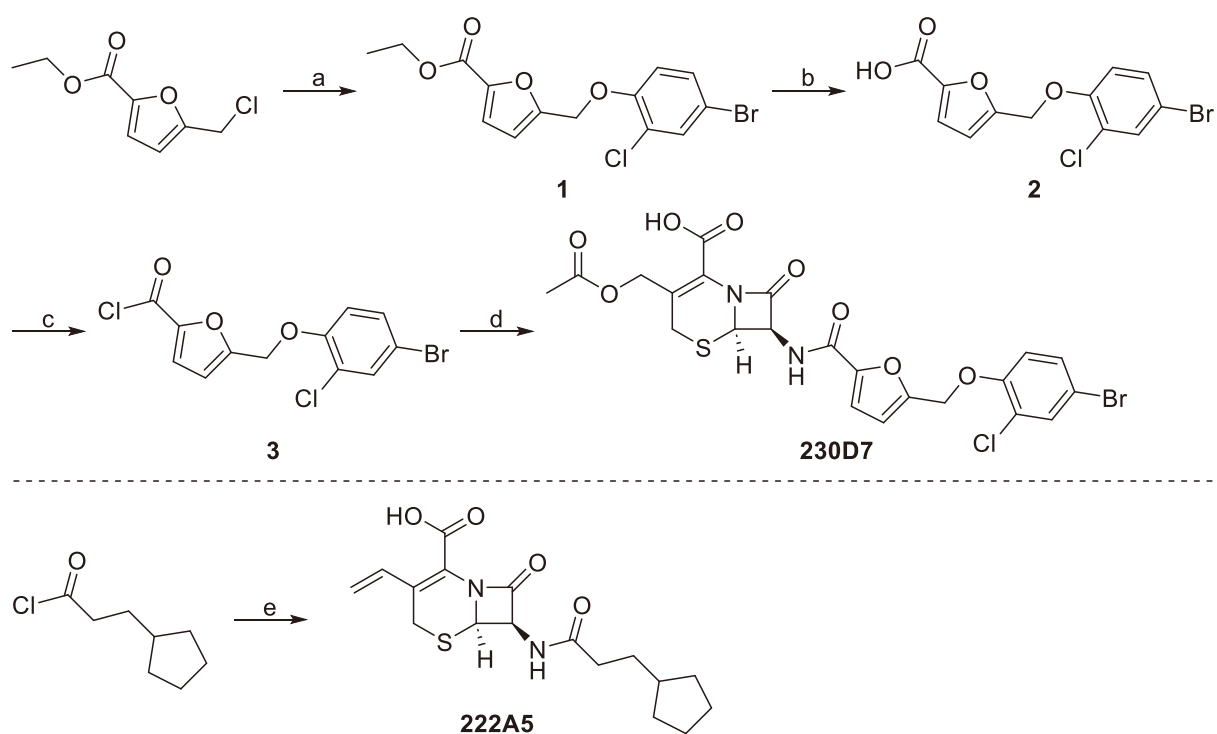

**Supplementary Fig. 8. Synthesis of Compounds 230D7 and 222A5<sup>a</sup>.** <sup>a</sup>Reagents and conditions: (a) 4-bromo-2-chlorophenol, K<sub>2</sub>CO<sub>3</sub>, DMF, 60 °C, 5 h; (b) NaOH, MeOH, H<sub>2</sub>O, 50 °C, 2 h; (c) SOCl<sub>2</sub>, reflux, 2 h; (d) (6*R*,7*R*)-3-(acetoxymethyl)-7-amino-8-oxo-5-thia-1-azabicyclo[4.2.0]oct-2-ene-2-carboxylic acid, NaHCO<sub>3</sub>, acetone, H<sub>2</sub>O, 0 °C–rt, 4 h; (e) (6*R*,7*R*)-7-amino-8-oxo-3-vinyl-5-thia-1-azabicyclo[4.2.0]oct-2-ene-2-carboxylic acid, NaHCO<sub>3</sub>, acetone, H<sub>2</sub>O, 0 °C–rt, 4 h.

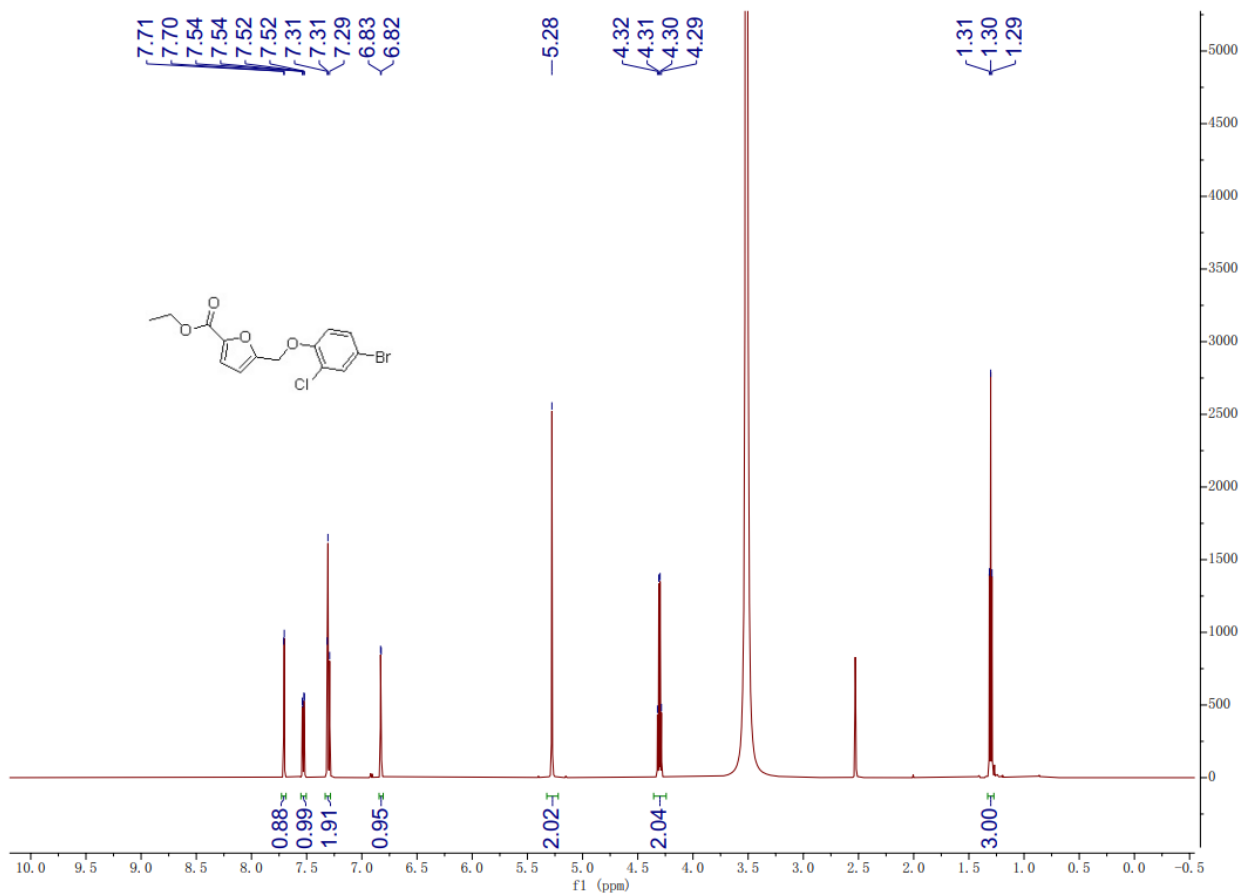

Supplementary Fig. 9. <sup>1</sup>H NMR of compound 1.



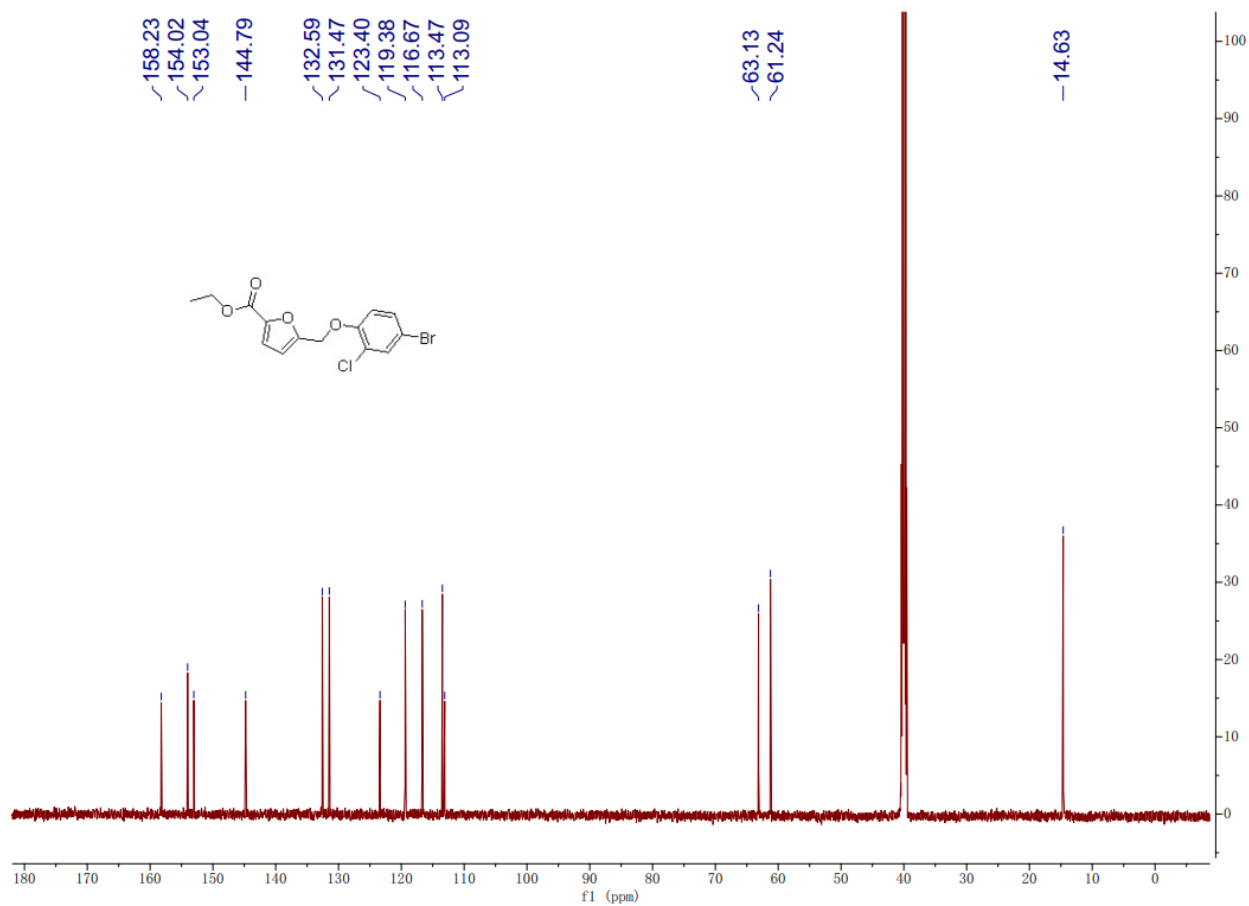

Supplementary Fig. 10. <sup>13</sup>C NMR of compound 1.

**Data Filename** ESIH202302023.d  
**Sample ID**  
**Instrument Name** Agilent G6520 Q-TOF  
**Acquired Time** 3/20/2023 16:04:22  
**DA Method** small molecular data analysis method.m

**Sample Name** F1-MS-13294-Easter  
**Position** P1-A2  
**Acq Method** 20160322\_MS\_ESIH\_POS\_1min.m  
**IRM Calibration Status** Success  
**Comment** ESIH by fangsu

User Spectra

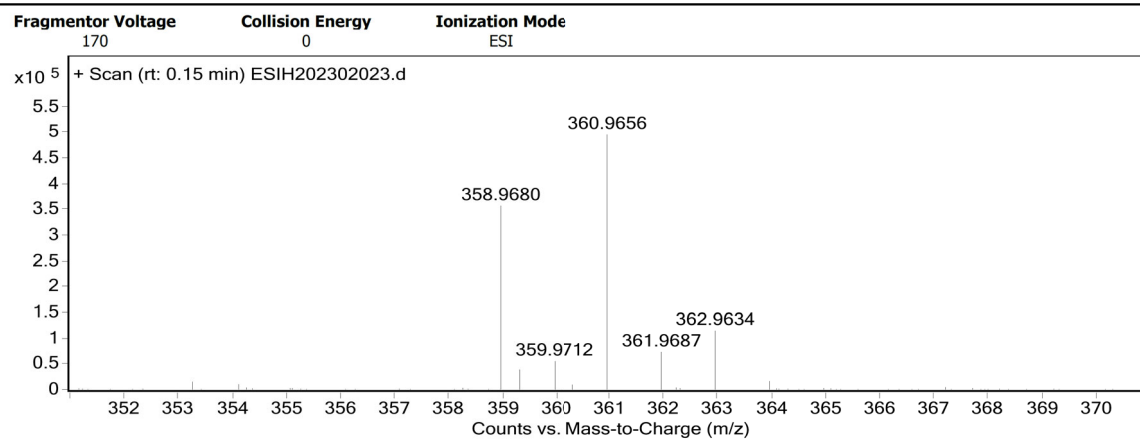

Formula Calculator Results

| m/z     | Calc m/z | Diff (mDa) | Diff (ppm) | Ion Formula      | Ion    |
|---------|----------|------------|------------|------------------|--------|
| 358.968 | 358.968  | 0.01       | 0.02       | C14 H13 Br Cl O4 | (M+H)+ |

Supplementary Fig. 11. HRMS of compound 1.

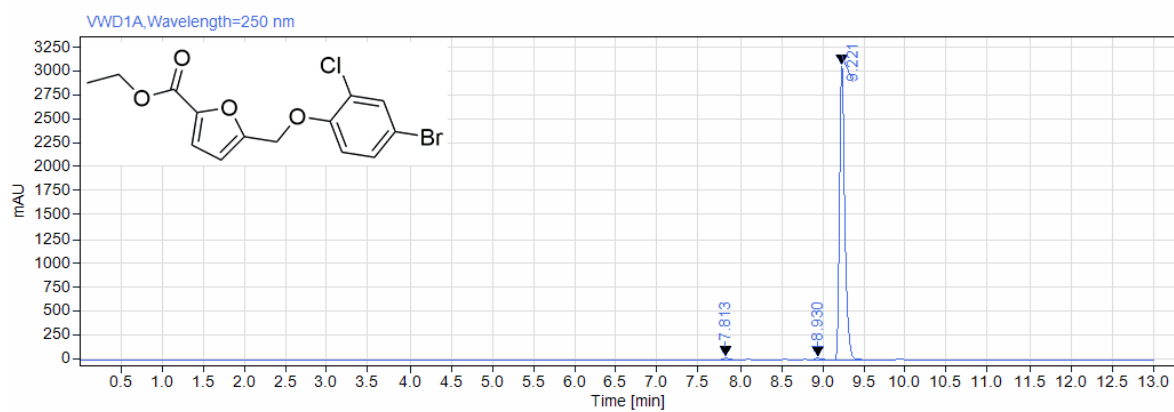

Signal: VWD1A, Wavelength=250 nm

| RT [min]   | Type | Width [min] | Area            | Height  | Area% | Name |
|------------|------|-------------|-----------------|---------|-------|------|
| 7.813      | BV   | 0.28        | 77.54           | 20.07   | 0.56  |      |
| 8.930      | VV   | 0.26        | 74.29           | 17.45   | 0.54  |      |
| 9.221      | VB   | 0.72        | 13604.55        | 3056.54 | 98.90 |      |
| <b>Sum</b> |      |             | <b>13756.38</b> |         |       |      |

**Supplementary Fig. 12. HPLC of compound 1.**

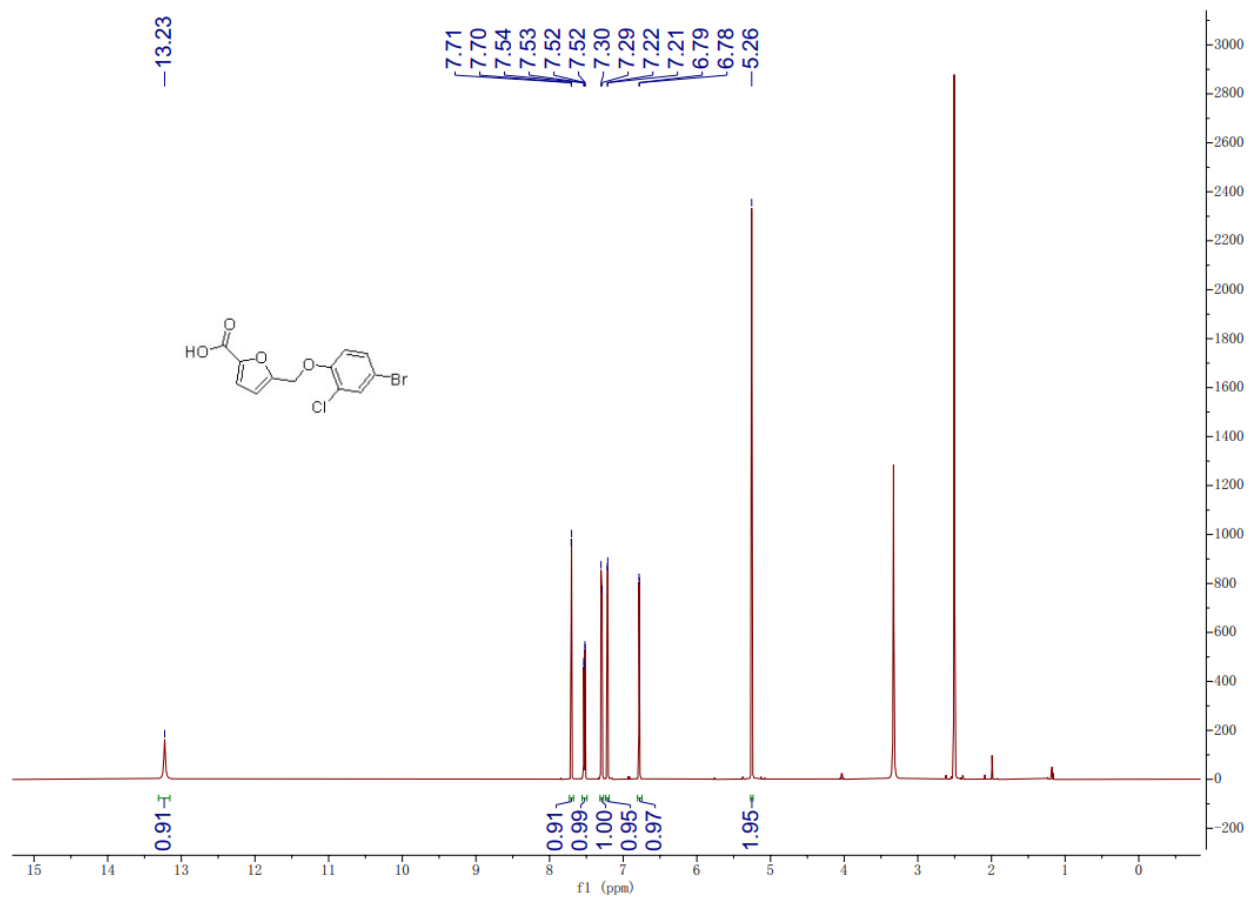

Supplementary Fig. 13. <sup>1</sup>H NMR of compound 2.

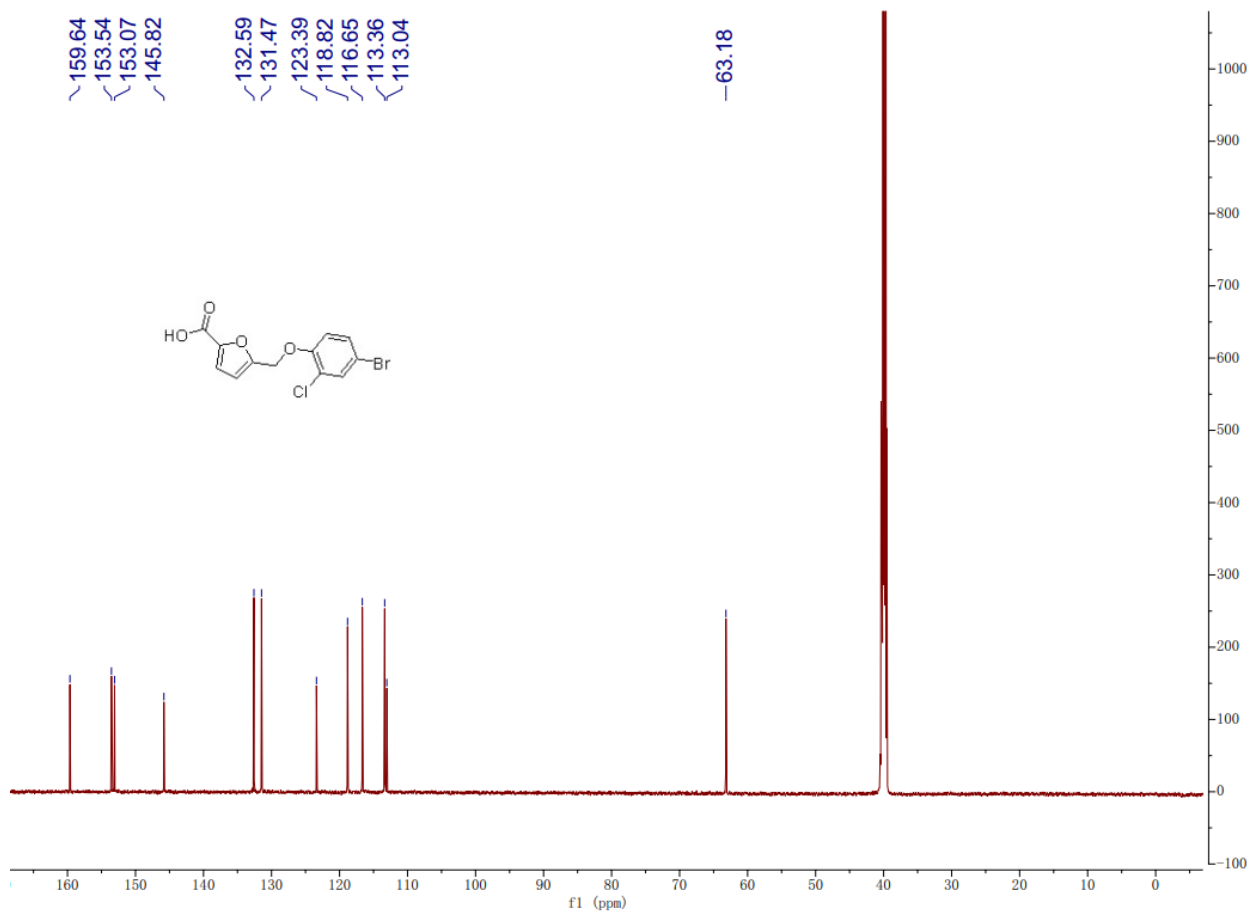

Supplementary Fig. 14.  $^{13}\text{C}$  NMR of compound 2.

|                        |                                        |                               |                             |
|------------------------|----------------------------------------|-------------------------------|-----------------------------|
| <b>Data Filename</b>   | N_ESIH202302022.d                      | <b>Sample Name</b>            | F1-MS-13294-Acid            |
| <b>Sample ID</b>       |                                        | <b>Position</b>               | P1-A1                       |
| <b>Instrument Name</b> | Agilent G6520 Q-TOF                    | <b>Acq Method</b>             | 20160324_MS_ESIH_NEG_1min.m |
| <b>Acquired Time</b>   | 3/20/2023 16:07:46                     | <b>IRM Calibration Status</b> | Success                     |
| <b>DA Method</b>       | small molecular data analysis method.m | <b>Comment</b>                | ESIH by fangsu              |

User Spectra

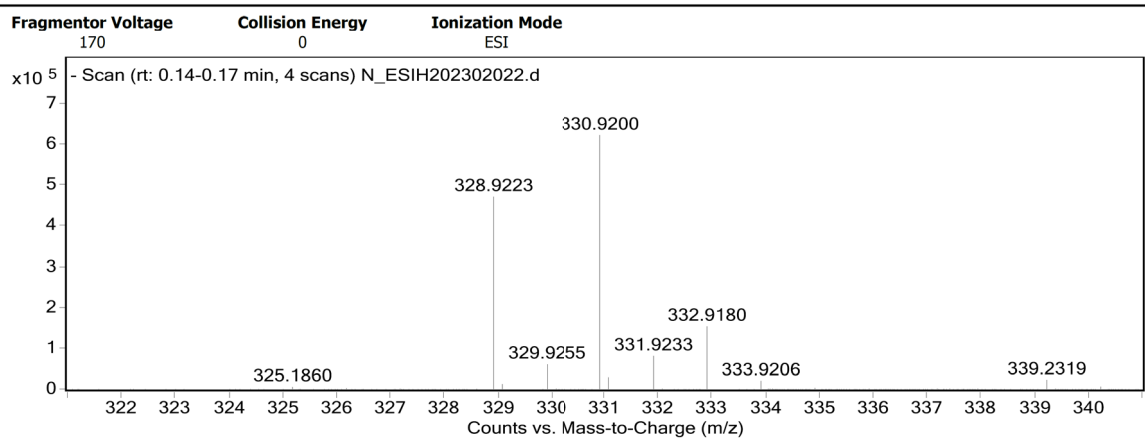

Formula Calculator Results

| m/z      | Calc m/z | Diff (mDa) | Diff (ppm) | Ion Formula     | Ion    |
|----------|----------|------------|------------|-----------------|--------|
| 328.9223 | 328.9222 | -0.08      | -0.24      | C12 H7 Br Cl O4 | (M-H)- |

Supplementary Fig. 15. HRMS of compound 2.

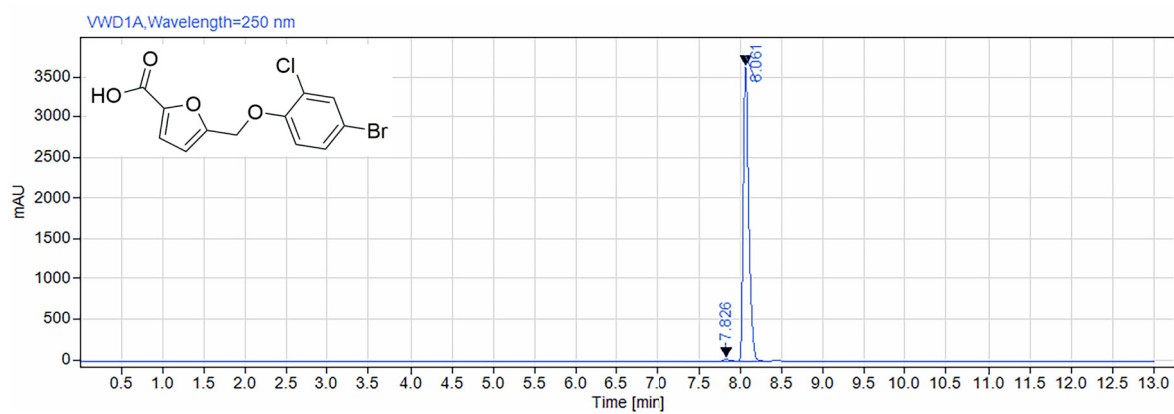

Signal: VWD1A,Wavelength=250 nm

| RT [min]   | Type | Width [min] | Area            | Height  | Area% | Name |
|------------|------|-------------|-----------------|---------|-------|------|
| 7.826      | BV   | 0.22        | 114.08          | 27.82   | 0.68  |      |
| 8.061      | VV   | 0.37        | 16751.46        | 3623.05 | 99.32 |      |
| <b>Sum</b> |      |             | <b>16865.55</b> |         |       |      |

**Supplementary Fig. 16. HPLC of compound 2.**





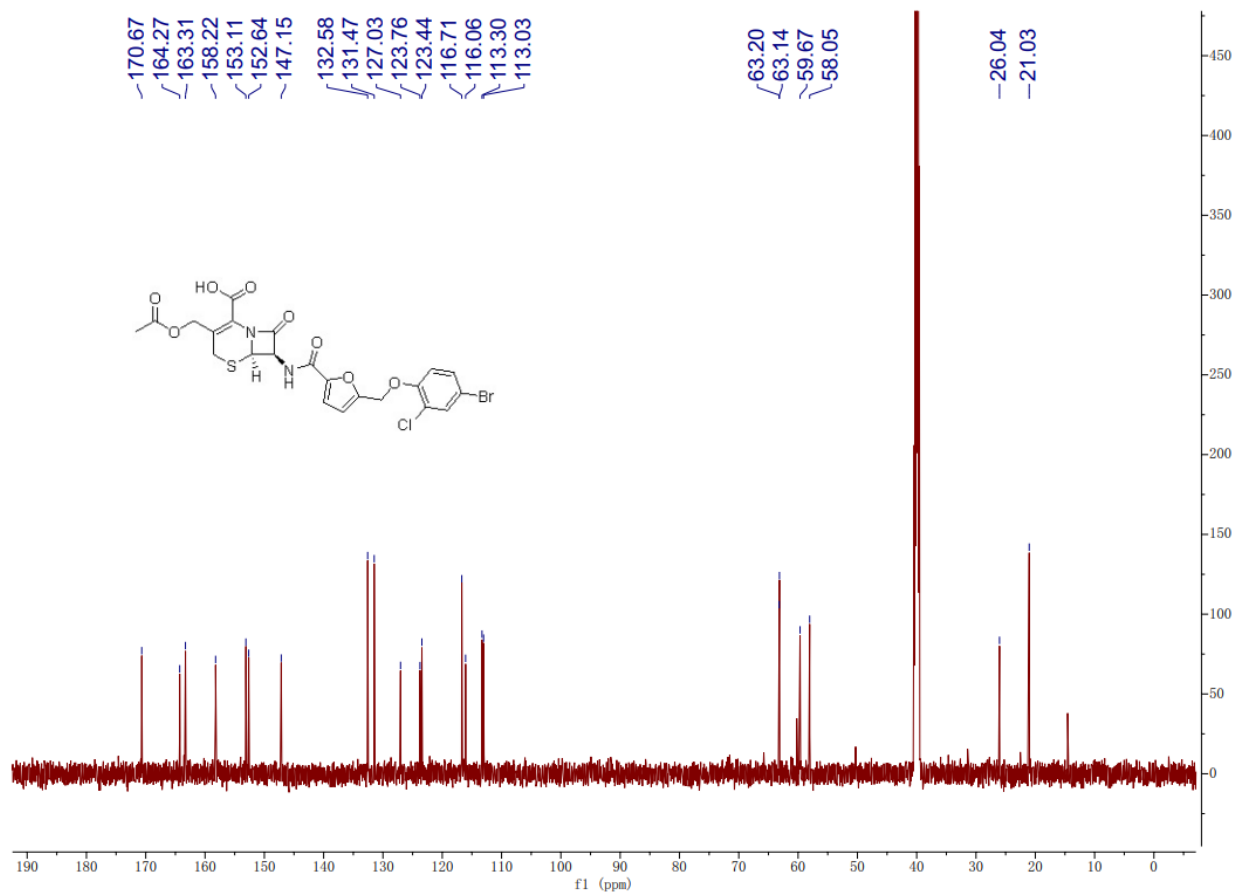

Supplementary Fig. 18.  $^{13}\text{C}$  NMR of 230D7.

**Data Filename** ESIH202204353.d  
**Sample ID**  
**Instrument Name** Agilent G6520 Q-TOF  
**Acquired Time** 11/2/2022 15:59:50  
**DA Method** small molecular data analysis method.m

**Sample Name** F1-F1-13294-230D7  
**Position** P1-A4  
**Acq Method** 20160322\_MS\_ESIH\_POS\_1min.m  
**IRM Calibration Status** Success  
**Comment** ESIH by fangsu

User Spectra

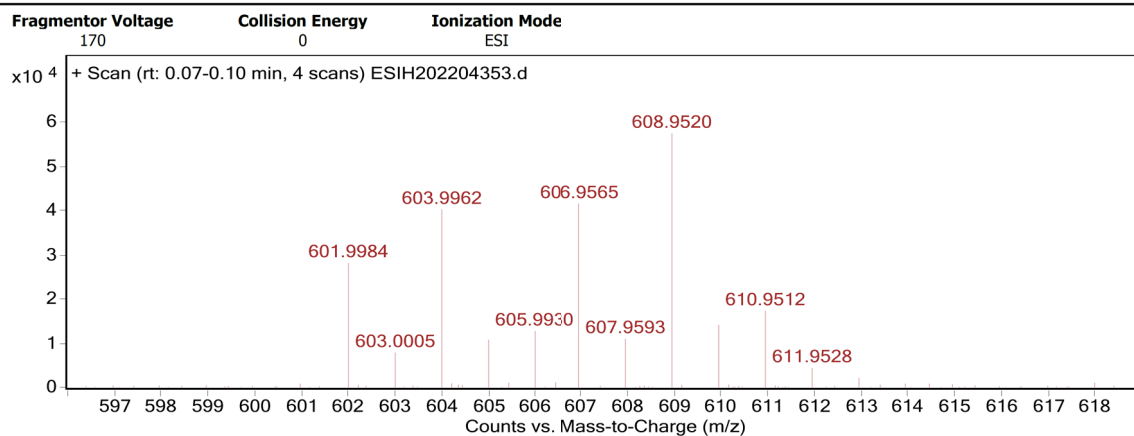

Formula Calculator Results

| m/z      | Calc m/z | Diff (mDa) | Diff (ppm) | Ion Formula              | Ion      |
|----------|----------|------------|------------|--------------------------|----------|
| 606.9565 | 606.9548 | -1.72      | -2.84      | C22 H18 Br Cl N2 Na O8 S | (M+Na)+  |
| 601.9984 | 601.9994 | 0.98       | 1.62       | C22 H22 Br Cl N3 O8 S    | (M+NH4)+ |

Supplementary Fig. 19. HRMS of compound 230D7.

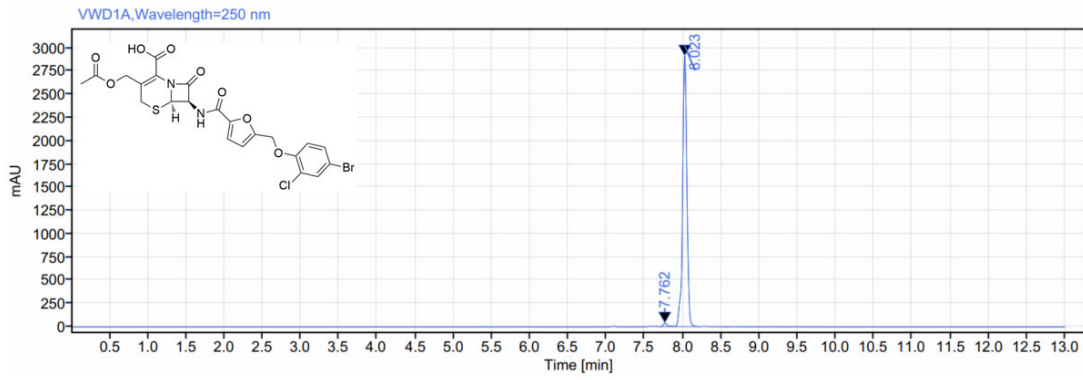

Signal: VWD1A,Wavelength=250 nm

| RT [min]   | Type | Width [min] | Area            | Height  | Area% | Name |
|------------|------|-------------|-----------------|---------|-------|------|
| 7.762      | BV   | 0.20        | 159.92          | 37.63   | 1.40  |      |
| 8.023      | VB   | 0.32        | 11239.88        | 2910.64 | 98.60 |      |
| <b>Sum</b> |      |             | <b>11399.80</b> |         |       |      |

Supplementary Fig. 20. HPLC of 230D7.



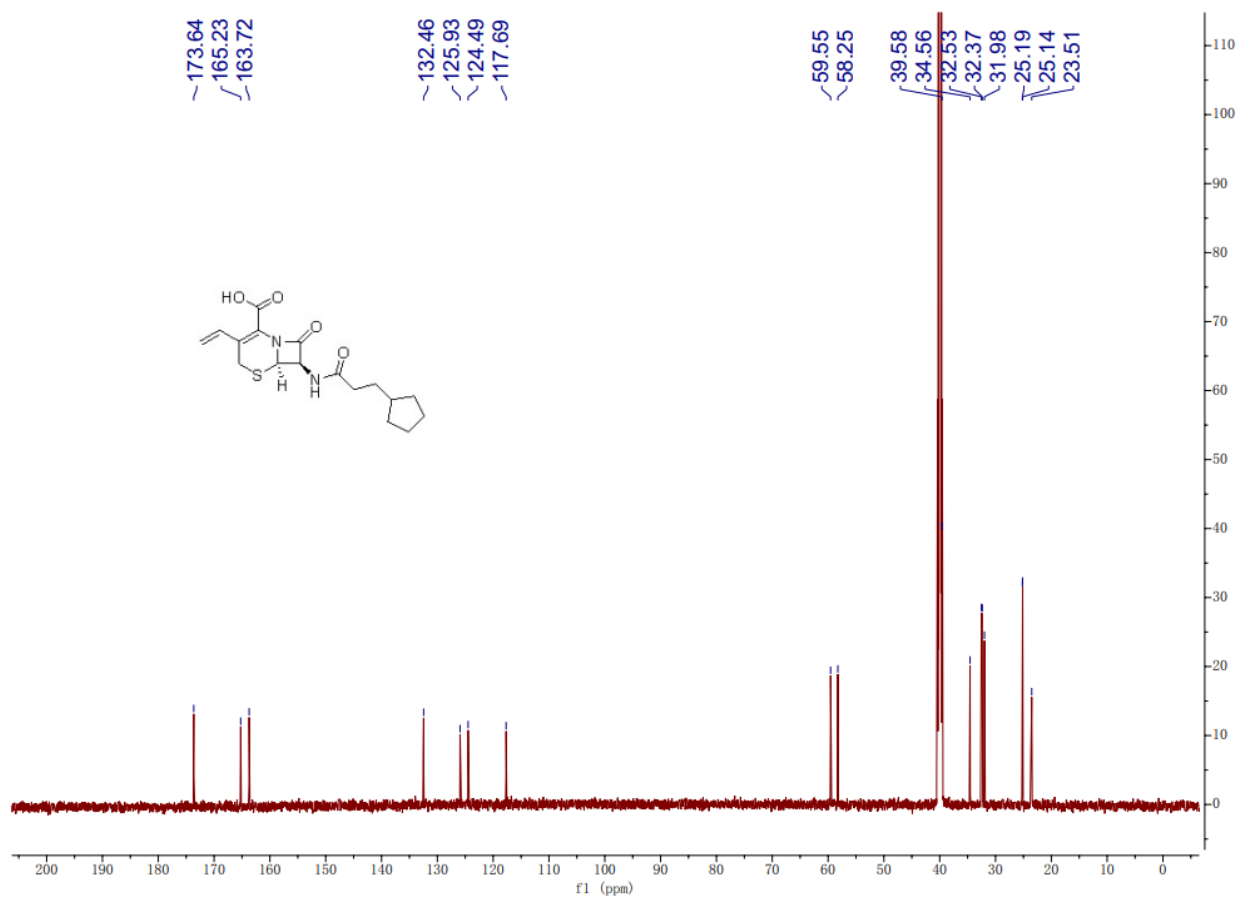

Supplementary Fig. 22.  $^{13}\text{C}$  NMR of 222A5.

**Data Filename** ESIH202302087.d  
**Sample ID**  
**Instrument Name** Agilent 6520 Q-TOF  
**Acquired Time** 3/23/2023 14:45:53  
**DA Method** small molecular data analysis method.m

**Sample Name** F1-F1-MS-222A5  
**Position** P1-A4  
**Acq Method** 20160322\_MS\_ESIH\_POS\_1min.m  
**IRM Calibration Status** Success  
**Comment** ESIH by fangsu

User Spectra

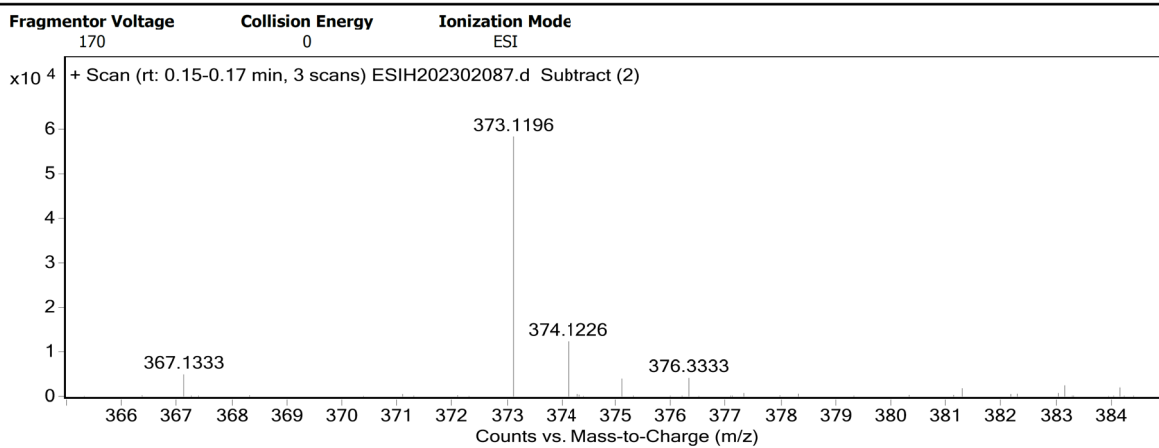

Formula Calculator Results

| m/z      | Calc m/z | Diff (mDa) | Diff (ppm) | Ion Formula        | Ion     |
|----------|----------|------------|------------|--------------------|---------|
| 373.1196 | 373.1192 | -0.37      | -0.98      | C17 H22 N2 Na O4 S | (M+Na)+ |

Supplementary Fig. 23. HRMS of compound 222A5.

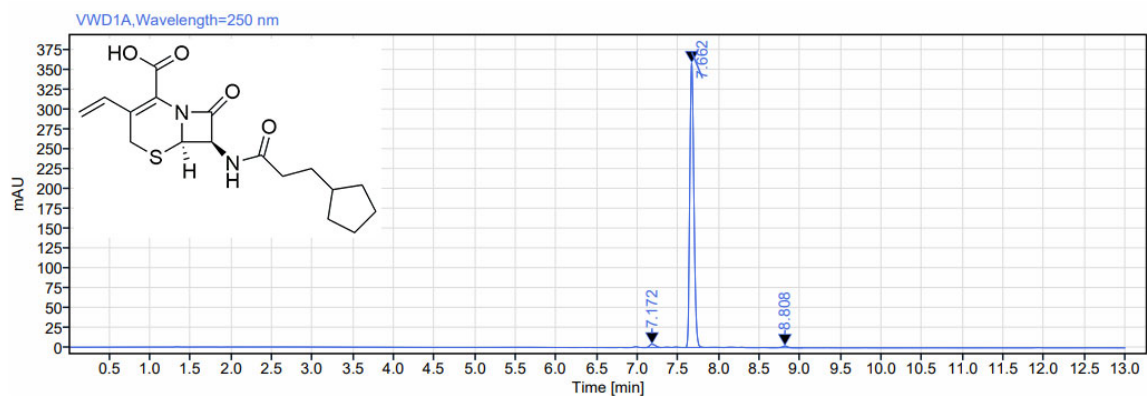

Signal: VWD1A, Wavelength=250 nm

| RT [min]   | Type | Width [min] | Area           | Height | Area% | Name |
|------------|------|-------------|----------------|--------|-------|------|
| 7.172      | BV   | 0.22        | 21.73          | 4.17   | 1.72  |      |
| 7.662      | BB   | 0.28        | 1233.89        | 358.07 | 97.48 |      |
| 8.808      | VB   | 0.41        | 10.19          | 2.28   | 0.81  |      |
| <b>Sum</b> |      |             | <b>1265.81</b> |        |       |      |

Supplementary Fig. 24. HPLC of 222A5.

**Supplementary Tab 1. External performance on a large external set.**

|     | <b>TransformerCPI<br/>2.0</b> | <b>TransformerCPI</b> | <b>GraphDTA</b> | <b>GCN</b> | <b>MolTrans</b> | <b>CPI-<br/>GNN</b> |
|-----|-------------------------------|-----------------------|-----------------|------------|-----------------|---------------------|
| AUC | 0.670                         | 0.638                 | 0.646           | 0.641      | 0.630           | 0.519               |
| PRC | 0.395                         | 0.360                 | 0.346           | 0.341      | 0.340           | 0.311               |



**Supplementary Tab 2. External performance on a time-split set.**

|     | <b>TransformerCPI<br/>2.0</b> | <b>TransformerCPI</b> | <b>GraphDTA</b> | <b>GCN</b> | <b>MolTrans</b> | <b>CPI-<br/>GNN</b> |
|-----|-------------------------------|-----------------------|-----------------|------------|-----------------|---------------------|
| AUC | 0.639                         | 0.605                 | 0.609           | 0.605      | 0.599           | 0.525               |
| PRC | 0.637                         | 0.589                 | 0.590           | 0.592      | 0.595           | 0.517               |

**Supplementary Tab 3. EF values of different tools on DUD-E set.**

|               | <b>TransformerCPI2.0</b> | <b>GOLD</b> | <b>AutoDock Vina</b> |
|---------------|--------------------------|-------------|----------------------|
| <b>EF0.5%</b> | 11.028                   | 14.659      | 9.516                |
| <b>EF1.0%</b> | 8.488                    | 11.983      | 7.995                |
| <b>EF5.0%</b> | 4.286                    | 5.872       | 4.382                |

**Supplementary Tab 4. EF values of different tools on Dekois 2.0 set.**

|               | <b>TransformerCPI2.0</b> | <b>GOLD</b> | <b>AutoDock Vina</b> |
|---------------|--------------------------|-------------|----------------------|
| <b>EF0.5%</b> | 6.460                    | 5.750       | 5.464                |
| <b>EF1.0%</b> | 5.490                    | 5.364       | 4.513                |
| <b>EF5.0%</b> | 3.319                    | 3.348       | 2.824                |

**Supplementary Tab 5. Performance on the whole substitution dataset.**

| <b>Accuracy</b> | <b>TransformerCPI2.0</b> | <b>TransformerCPI</b> | <b>GraphDTA</b>   | <b>GCN</b>        | <b>Blind Guess</b> |
|-----------------|--------------------------|-----------------------|-------------------|-------------------|--------------------|
| <b>overall</b>  | $0.567 \pm 0.006$        | $0.504 \pm 0.010$     | $0.506 \pm 0.007$ | $0.507 \pm 0.010$ | 0.5                |

**Supplementary Tab 6. Performance on the subset dataset, where the corresponding biological activities increase or decrease by at least three orders of magnitude.**

| <b>Accuracy</b> | <b>TransformerCPI2.0</b> | <b>TransformerCPI</b> | <b>GraphDTA</b>   | <b>GCN</b>        | <b>Blind Guess</b> |
|-----------------|--------------------------|-----------------------|-------------------|-------------------|--------------------|
| <b>overall</b>  | $0.641 \pm 0.008$        | $0.566 \pm 0.008$     | $0.575 \pm 0.011$ | $0.517 \pm 0.009$ | 0.5                |

**Supplementary Tab 7. SPOP screen compound list.**

| ID         | ChemD<br>iv ID | SMILES                                                                                                                 | SCO<br>RE    |
|------------|----------------|------------------------------------------------------------------------------------------------------------------------|--------------|
| 221<br>A3  | Y020-<br>9678  | <chem>O=C2N(C=CC=3N=CC=1C(=O)N(C=CC=1C2=3)C4=CC=C(C=C4)OC)N5C=NN=C5</chem>                                             | 0.71<br>7187 |
| 221<br>A4  | Y020-<br>9740  | <chem>[Cl]/C2=N/C=1CCCCC=1N2</chem>                                                                                    | 0.91<br>1182 |
| 221<br>A5  | Y040-<br>0758  | <chem>O=C4OC2=CC(C)=CC(OCC(=O)N[C@@]1([H])CCC[C@@](C)([H])[C@]1(C)[H])=C2C=3CCC<br/>CC=34</chem>                       | 0.79<br>5049 |
| 221<br>A6  | Y040-<br>6856  | <chem>O=C(O)[C@@]1([H])N[C@]([H])([S]C1)C=2/C=C(O)C(=CC=2)OC</chem>                                                    | 0.67<br>7123 |
| 221<br>A7  | Y042-<br>2850  | <chem>O=C3C(O)=C(/C1=C/N(C)N=C1)C2=CC=CC=C2N3C</chem>                                                                  | 0.68<br>9197 |
| 221<br>A8  | Y042-<br>7195  | <chem>O=C5N4C1=CC=CC=C1C(=O)N(CC(=O)N/C3=C/C=2C=CC(=CC=2N=C3)OC)[C@]4([H])C=6<br/>C=CC=CC5=6</chem>                    | 0.74<br>2336 |
| 221<br>A9  | Y042-<br>7748  | <chem>O=C2C=C(N=C1[S]C=NN12)C[S]CCN</chem>                                                                             | 0.77<br>3825 |
| 221<br>A10 | Y043-<br>0432  | <chem>O=C5N(C)[C@]([H])(C=2C=C1OCOC1=CC=2)[C@@]([H])(C(=O)NC=4C=C3NC=CC3=CC=4<br/>)C6=CC=CC=C56</chem>                 | 0.76<br>356  |
| 221<br>B3  | Y203-<br>9186  | <chem>O=C(N/C1=N/C(=C[S]1)C2=CC=CC=3C=CC=CC2=3)[C@]4([H])CCCC[C@@]4([H])C(=O)O</chem>                                  | 0.91<br>1547 |
| 221<br>B4  | Y203-<br>9240  | <chem>O=C(N/C1=C/C=C/C=C1/CC)[C@]3([H])[C@@]2([H])C=C[C@]([H])(C2)[C@]3([H])C(=O)O</chem>                              | 0.75<br>825  |
| 221<br>B5  | Y203-<br>9473  | <chem>O=C(NC=1C=C(C=CC=1)CC)[C@]2([H])CC=CC[C@@]2([H])C(=O)O</chem>                                                    | 0.78<br>8327 |
| 221<br>B6  | Y205-<br>4786  | <chem>O=C(N[C@@](C)([H])[C@]1([H])OCCC1)C/C2=C(\Cl)C=C/C=C2/[F]</chem>                                                 | 0.66<br>5194 |
| 221<br>B7  | Y205-<br>4803  | <chem>O=[S](=O)(N1CCC=2C=CC=CC1=2)C=5C=CC(NC(=O)[C@]3([H])[C@]([H])(C(=O)O)[C@]4(<br/>[H])O[C@@]3([H])CC4)=CC=5</chem> | 0.73<br>789  |
| 221<br>B8  | Y205-<br>8024  | <chem>O=C(N[C@]1([H])CCCC1)C2=C([S]C(C)=C2C)NC(=O)[C@]3([H])[C@@]([H])(C(=O)O)[C@]<br/>4([H])C=C[C@]3([H])CC4</chem>   | 0.66<br>742  |
| 221<br>B9  | Y205-<br>9539  | <chem>O=C(NC=2C=C1CCCC1=CC=2)[C@]3([H])[C@]([H])(C(=O)O)[C@]4([H])O[C@@]3([H])C=<br/>C4</chem>                         | 0.71<br>8496 |
| 221<br>B10 | Y205-<br>9761  | <chem>O=C(N/C1=C/C=C(/[F])C=C1[F])[C@@]2([H])[C@@]([H])(C(=O)O)[C@@]3([H])O[C@]2([H]<br/>)CC3</chem>                   | 0.75<br>4913 |
| 221<br>C3  | Y206-<br>4045  | <chem>O=C(NC=1/C=C(/OC)C=CC=1)[C@@]2([H])[C@@]([H])(C(=O)O)[C@@]3([H])C[C@]2([H])<br/>CC3</chem>                       | 0.69<br>853  |
| 221<br>C4  | Y206-<br>4218  | <chem>O=C(N2C=1C=CC=CC=1C[C@]2(C)[H])[C@@]3([H])[C@@]([H])(C(=O)O)[C@@]4([H])C[C<br/>@]3([H])CC4</chem>                | 0.84<br>3582 |
| 221<br>C5  | Y500-<br>7017  | <chem>[F]C([F])([F])C1=CC(=NC2=C1C(=NN2)C3([H])CC3)C=4C=NN(CC)C=4C</chem>                                              | 0.75<br>2009 |
| 221<br>C6  | Y501-<br>9359  | <chem>N#CC=1C=NN2C=1N[C@]([H])(C[C@@]2([H])C([F])([F])[F])C=3C=CC([F])=CC=3</chem>                                     | 0.67<br>7206 |
| 221<br>C7  | Y502-<br>3210  | <chem>O=C1N2C(C(O)=O)=C(CSC3=NN=C(C)S3)CSC2C1NC(C4=CC=C(COC5=C(Cl)C=CC=C5)O4<br/>)=O</chem>                            | 0.71<br>5588 |
| 221<br>C8  | Y502-<br>9376  | <chem>O=C1N(C(=O)[C@@]2([H])CCCC[C@@]12[H])[C@@](C)([H])C3=CC(=CC=C3)N4C=CC=C<br/>4</chem>                             | 0.78<br>0379 |
| 221<br>C9  | Y503-<br>2847  | <chem>O=C(NN)[C@](C)([H])N1N=C(/C=C1/[C@]2([H])CC2)C([F])([F])[F]</chem>                                               | 0.72<br>9244 |
| 221<br>C10 | Y600-<br>3985  | <chem>O=C1N(NC2=CC(=O)N(C(C)=C12)C3([H])CCCCC3)C5=NC=4C=CC=CC=4[S]5</chem>                                             | 0.71<br>4081 |
| 221<br>D3  | ZE09-<br>1328  | <chem>O=C(C=2[S]C1=C/C=C(/NC(=O)[C@@]([Cl])(C)[H])C=C1C=2OC)N3CCCCC3</chem>                                            | 0.78<br>9824 |
| 221<br>D4  | Y043-<br>4548  | <chem>O=C1N[C@@]2([H])[C@@]([H])(N1)C[S][C@@]2([H])CCCC(=O)NCC/C3=C/NC4=C/C=C(<br/>/[Cl])C=C34</chem>                  | 0.81<br>8989 |
| 221<br>D5  | Y205-<br>0195  | <chem>N#C/C1=C(/[S]C=2CCCCCCCCCCC1=2)NC(=O)[C@]3([H])CCCC[C@@]3([H])C(=O)O</chem>                                      | 0.68<br>645  |
| 221<br>D6  | Y600-<br>4705  | <chem>O=C1C(C)=C(N/C=C1/C)C[Cl]</chem>                                                                                 | 0.73<br>3618 |

|         |           |                                                                                                                                     |              |
|---------|-----------|-------------------------------------------------------------------------------------------------------------------------------------|--------------|
| 231-A3  | 1185-0186 | [Cl]/C1=C/C=CC([Cl])=C1N/C2=N/C(=C([S]2)C=3C=CC=CC=3)C=4C=CC([S]C)=CC=4                                                             | 0.82<br>7448 |
| 231-A4  | 3091-4746 | O=C3N(C=1/C=C(/[F])C(C)=CC=1)[C@]([H])(C2=CC(=C/C=C2/OC)OC)[C@@]3([H])N5C(=O)C=4C=C(C=CC=4C5=O)[N+](/[O-])=O                        | 0.69<br>8414 |
| 231-A5  | 3238-0180 | O=C3N(C)C=2/N=C(/NCCCOC)N(C/C1=C/C=C/C1/[F])C=2C(=O)N3C                                                                             | 0.78<br>4697 |
| 231-A6  | 3260-0051 | N=C3N(C[C@](O)([H])C=1[S]C=CC=1)C2=CC=CC=C2N3CCN4CCCCC4                                                                             | 0.75<br>9465 |
| 231-A7  | 4593-5763 | O=C5N(C=2[S]C=1CCCCC=1C=2C(=O)OCC)C(=O)[C@@]6([H])ON(C=3C=CC=CC=3C)[C@]([H])(C4=C/C=C(/C)C=C4)[C@]56[H]                             | 0.97<br>8679 |
| 231-A8  | 5055-3945 | N#C/C1=C(/[S]C=2CCCC1=2)N6C(=O)[C@@]5([H])ON(/C3=C/C=C(/[Cl])C=C3)[C@@]([H])(C=4OC=CC=4)[C@]5([H])C6=O                              | 0.97<br>9211 |
| 231-A9  | 5055-4009 | O=C4N(C(=O)[C@]3([H])ON(C=1C=CC=CC=1C)[C@]([H])(C=2[S]C=CC=2)[C@@]34[H])C5=C/C=C(/[Cl])C=C5                                         | 0.89<br>3642 |
| 231-A10 | 5282-0816 | N=C3N(C=2N=C1C=CC(C)=CN1C(=O)C=2/C=C3/C(=O)N[C@@]4([H])CCCC4)[C@@]5([H])CCCC5                                                       | 0.67<br>9165 |
| 231-B3  | 5339-0200 | O=C4N(C)C=3N=CN(C/C1=C/C=CC2=CC=CC=C12)C=3C(=O)N4C                                                                                  | 0.70<br>898  |
| 231-B4  | 5782-4753 | O=C1N(C(=O)[C@]2([H])[C@@]1([H])[C@]3([H])C[C@@]2([H])CC3)[C@]([H])(C/C4=C/C=CC=C4)C(=O)N/C5=C/C/[Cl])=C/C=C5/C                     | 0.84<br>0434 |
| 231-B5  | 5847-0271 | O=C1C(=COC=2C1=C/C=C(/O)C=2CN4CCN(CC=3C=CC=CC=3)CC4)C5=CC=C/C=C5/[Cl]                                                               | 0.73<br>2585 |
| 231-B6  | 6056-0816 | O=C(/C2=C/N(CC(=O)NC[C@@]1([H])OCCC1)C3=C2C=C/C=C3/CC)C([F])([F])[F]                                                                | 0.68<br>3887 |
| 231-B7  | 7238-1536 | O=C(N/C1=C(\C)C=C/C=C1/CC)[C@]3([H])[S]C2=NN=C(N2N[C@@]3([H])C4=CC=CC=C4)C5=CC=CC=C5                                                | 0.74<br>7739 |
| 231-B8  | 8001-2890 | O=C(C=2[S]C=1N=C(C=CC=1C=2N)C=3[S]C=CC=3)N5CCC=4C=CC=CC=4[C@]5([H])CNC(=O)[C@@]6([H])CCCCC6                                         | 0.69<br>7008 |
| 231-B9  | 8006-9338 | O=C1N(C(=O)[C@]2([H])[C@@]1(C)[C@@]3([H])C=C[C@]2([H])C3)C=4C=CC(=CC=4)C(=O)OCC                                                     | 0.81<br>3252 |
| 231-B10 | 8006-9693 | O=C1N(C(=O)[C@@]2([H])[C@@]1([H])[C@]([H])(CC[C@]2([H])C3=CC=CC=C3)C4=CC=CC=C4)C=5C=CC(=CC=5)[N+](/[O-])=O                          | 0.74<br>1062 |
| 231-C3  | 8010-8365 | O=C(C)C1=C(C[C@](O)(C)[C@@]([H])(C(=O)C)[C@]1([H])C=2/C=C(/OC)C(=CC=2)OC)N/C3=C/C=C(/[Br])C=C3                                      | 0.67<br>9074 |
| 231-C4  | 8011-5826 | O=C1N(C(=O)[C@@]3([H])[C@@]1([H])[C@]4([H])C=2C=CC=CC=2[C@@]3([H])C=5C=C(C=CC4=5)[C@@]([H])(CC[S]C)C(=O)NC=6/C=C(/[Cl])C([Cl])=CC=6 | 0.74<br>474  |
| 231-C5  | 8012-5299 | [O-][N+](=O)C2=C1C=CC(=NC1=C/C=C2/C)C4=CC=3/C=C(/C)C=CC=3N=C4                                                                       | 0.72<br>6103 |
| 231-C6  | 8012-7811 | O=C2N(C=1C=CC([Br])=CC=1[C@]2([H])[C@]4([H])[S]C=3C=CC=CC=3NC4=O)C(=O)C                                                             | 0.71<br>9762 |
| 231-C7  | 8013-0260 | O=C(N1[C@]([H])(C[S][C@]1([H])C2=C/C=C(/C)C=C2)C(=O)O)C3=CC([Cl])=CC=C3                                                             | 0.86<br>5409 |
| 231-C8  | 8013-1552 | O=C4[S]C2=C([S][C@]([H])(C(=O)O)[C@@]3([H])C(=O)OC=1C=CC=CC=1[C@]23[H])N4C/C5=C/C=CC=C5                                             | 0.83<br>0558 |
| 231-C9  | 8013-5880 | O=C3N(CC/C1=C(\C)NC=2C=CC(=CC1=2)OC)C(=O)[C@@]4([H])CCCC[C@]34[H]                                                                   | 0.85<br>3814 |
| 231-C10 | 8014-8857 | O=C1N(C(=O)[C@@]2([H])[C@]1([H])[C@@]([H])(N[C@]2(CC)C(=O)O)C3=CC=C/C=C3/O)C4=CC([Cl])=CC=C4                                        | 0.90<br>5549 |
| 231-D3  | 8015-3422 | CO/C4=C/C=3CC[C@]2([H])[S]C=1C=CC=CC=1N=C2C=3C=C4                                                                                   | 0.82<br>399  |
| 231-D4  | 8015-7350 | O=C1N(C(=O)[C@@]2([H])[C@]1([H])[C@@]3(N[C@@]2([H])CC(C)(C)[H])C(=O)N(CC(=O)OCC)C4=CC=CC=C34)C=5C=CC=C6C=CC=CC=56                   | 0.95<br>3058 |
| 231-D5  | 8016-0378 | O=C1N(C(=O)[C@@]2([H])[C@@]1([H])[C@@]4(N[C@@]2(C)[H])C(=O)N(C/C3=C/C=C(/[F])C=C3)C=5C=CC=CC4=5)C6=CC=CC=C6                         | 0.90<br>9611 |
| 231-D6  | 8017-1330 | O=C1C(=O)[C@]3(C)CC[C@@]1(C(=O)NC=2/C=C(/[F])C=CC=2[F])C3(C)C                                                                       | 0.89<br>6598 |
| 231-D7  | 8017-2278 | O/C1=C/C=C(C=C1)C4=NN2C(=N/N=C2/C3=C/C=NC=C3)C=5C=CC=CC4=5                                                                          | 0.69<br>382  |
| 231-D8  | 8017-3040 | O=C3O[C@@]([H])(C1=CC=CC=C1)[C@]([H])(C=2C=CC=CC=2)[C@@]3([H])NC=4C=CC([I])=CC=4C(=O)O                                              | 0.71<br>9256 |

|         |              |                                                                                                                             |              |
|---------|--------------|-----------------------------------------------------------------------------------------------------------------------------|--------------|
| 231-D9  | 8017-6609    | O=C1N(C(=O)[C@]2([H])[C@@]1([H])[C@]4([H])C[C@@]2([H])[C@@]5([H])O/N=C/C3=C/C=C(/C=C3/OC)OC)[C@@]45[H])C=7C=C6C=CC=CC6=CC=7 | 0.75<br>5072 |
| 231-D10 | 8018-6686    | [O-][N+](=O)C=1C=CC(=CC=1)[C@]4([H])O[C@]2([H])CCCC[C@@]2([H])C=3[S]C=CC=34                                                 | 0.68<br>7403 |
| 231-E3  | 8018-7502    | O=C4OC(C)(C)[C@]3(C)C2=CC=1C=CC=CC=1N2CCN34                                                                                 | 0.88<br>8736 |
| 231-E4  | 8019-7720    | O=C1CC[C@@]([H])(C(=O)O)[C@@]([H])(N1CC=2C=CC=CC=2)C3=CC=C(C=C3)OC                                                          | 0.67<br>9759 |
| 231-E5  | 8020-2909    | [Cl]/C1=C/C=C/C=C1/CN3/C=C(/CNC/C2=C/C=CC=C2)C4=CC=CC=C34                                                                   | 0.81<br>8032 |
| 231-E6  | C082-0552    | O=C2N(CCC(=O)N/C1=C/C([F])=C(C)C=C1)C(=O)[C@@]3([H])[C@]2([H])[C@@]4([H])C=C[C@@]3([H])CC4                                  | 0.70<br>2275 |
| 231-E7  | C167-0196    | O=C(NCCN1CCCC2=CC=CC=C12)C3=CC(=NC4=CC=CC=C34)C=5[S]C=CC=5                                                                  | 0.78<br>6434 |
| 231-E8  | C202-1469    | O=C5N(C(=O)[C@]4([H])[C@@]1(CC(=O)N(C1=O)C2=C/C=C(/C)C=C2)N(CCCCC)[C@@]([H])(C=3C=CC(=CC=3OC)OC)[C@]45[H])C=6C=CC(C)=CC=6   | 0.98<br>6464 |
| 231-E9  | C289-0208    | O=C4N2CCC=1/C=C(/OCC)C(=CC=1[C@]2([H])[C@]([H])(C3=CC=CC=C34)C(=O)NCCCN5CCN(CC5)C6=CC=C/C=C6/[F])OCC                        | 0.77<br>7312 |
| 231-E10 | C362-0183    | O=C3C2=CC1=C(C=C/C=C1/[Cl])N(C2=NC(=O)N3[H])C=5C=C4C=CC=CC4=CC=5                                                            | 0.67<br>9811 |
| 231-F3  | C656-0366    | O=C2C=1N=NN(C=1N=CN2CC=3/C=C(/C)C=CC=3C)C=4C=CC(C)=CC=4                                                                     | 0.70<br>4669 |
| 231-F4  | C801-0098    | O=C2C=1C=NN(C=1N=CN2CC=3/C=C(/Cl)C=CC=3)C=4C=CC=CC=4                                                                        | 0.75<br>948  |
| 231-F5  | C890-0681    | O=C1C=3C(C=NN1/C2=C/C=CC=C2)=C(C)N(C=3C)[C@]([H])(CC)C(=O)N[C@]5([H])CCN(C/C4=C/C=CC=C4)CC5                                 | 0.66<br>7658 |
| 231-F6  | CM443 9-2906 | O=C2N1CCN(CC1=NN2CCC)C/C3=C/N/N=C3/C4=C/C(C)=C(C)C=C4                                                                       | 0.68<br>2379 |
| 231-F7  | D090-0038    | [Cl]C=4C=C3C=2CCC1=CN=C1C=2NC3=CC=4                                                                                         | 0.81<br>6077 |
| 231-F8  | D153-0157    | O=C(C)C1=NN(/N=C1/NC=2C=C(C=CC=2)N3N=NN=C3)C4=C/C=C(/OC([F])([F])[F])C=C4                                                   | 0.70<br>6973 |
| 231-F9  | D225-0021    | O=C2C=1NN=C(C=1[C@@]([H])(N2C)C=3C=NC=CC=3)C4=CC=C(C=C4)OC                                                                  | 0.70<br>5185 |
| 231-F10 | D505-0628    | O=[S](=O)(NCC=1C=CC([F])=CC=1)C2=CC(=C/C=C2/CC)C3=NN(C)C(=O)C=4CCCC3=4                                                      | 0.70<br>9343 |
| 231-G3  | E155-1258    | O=[S](=O)(C)NC[C@@]([H])(N1CCN(CC1)C=2C=CC(=CC=2)OC)C=3C=NC=CC=3                                                            | 0.66<br>8649 |
| 231-G4  | E209-0953    | O=C2N(C=CN(C/C1=C/C(=CC=C1)C([F])([F])[F])C2=O)C3=CC(C)=C(C)C=C3                                                            | 0.70<br>3854 |
| 231-G5  | E612-0534    | O=C1N(CC2=CC=CC=C12)[C@]([H])(C/C3=C/C=CC=C3)C(=O)NCC/C4=C/NC=5C=CC=CC4=5                                                   | 0.81<br>0952 |
| 231-G6  | E634-1423    | CN1C(=CC=2OC=CC1=2)C5=N/N=C(/[S]CC=3N=C(OC=3C)C=4[S]C=CC=4)N5C=6C=CC=C=C=6C                                                 | 0.67<br>575  |
| 231-G7  | E959-0971    | O=C3/C(=C(/N[C@]1([H])CCCC=2C=CC=CC1=2)C3=O)C=5C=C4CCCC4=CC=5                                                               | 0.92<br>6352 |
| 231-G8  | F321-0661    | O=C(NC=1C=C(C=CC=1)C=2N=C(ON=2)[C@@]3([H])CCCC3)[C@]4([H])CCCC4                                                             | 0.73<br>9761 |



**Supplementary Tab 8. Ranking result of TransformerCPI2.0 and other tools screening the same compound library against SPOP.**

| <b>Method</b>            | <b>221C7 ranking</b>         |
|--------------------------|------------------------------|
| <b>TransformerCPI2.0</b> | 34,495/1386372, Top 2.5%     |
| <b>TransformerCPI</b>    | 1,367,035/1386372, Top 98.6% |
| <b>GraphDTA</b>          | 231,129/1386372, Top 16.7%   |
| <b>GCN</b>               | 385,186/1386372, Top 27.8%   |
| <b>Docking (Glide)</b>   | 229,874/1386372, Top 16.6%   |

**Supplementary Tab 9. Tanimoto similarity between hits and known SPOP inhibitors calculated by ECFP fingerprints.**

|               | <b>6b</b> |
|---------------|-----------|
| <b>221C7</b>  | 0.18      |
| <b>221C10</b> | 0.15      |
| <b>231A10</b> | 0.30      |
| <b>231D8</b>  | 0.16      |

**Supplementary Tab 10. RNF130 screen compound list.**

| ID         | ChEMBL_ID    | SMILES                                                       | SCORE        |
|------------|--------------|--------------------------------------------------------------|--------------|
| iRNF130-1  | CSC000581113 | <chem>CS(=O)(=O)C=1C=CC(Cl)=C(NC(=O)C2CC2)C1</chem>          | 0.95675<br>5 |
| iRNF130-2  | CSC026929245 | <chem>CN1N=NN=C1SCC=2C=C(Cl)C=3OCCOC3C2</chem>               | 0.91005<br>4 |
| iRNF130-3  | CSC016396878 | <chem>NC(=O)CSC1=NN=C(NC2CC2)S1</chem>                       | 0.92887<br>7 |
| iRNF130-4  | CSC133087246 | <chem>BrC=1C=CC=C(Cl)[C@H]2CC(=O)N(CCC#N)C(=O)N2</chem>      | 0.96341<br>4 |
| iRNF130-5  | CSC116288185 | <chem>CCN(CC)C(=O)N1CCC(CC1)C2=NC(=NO2)C3C=CC=NC3=O</chem>   | 0.94085<br>9 |
| iRNF130-6  | CSC027259745 | <chem>Br.C1CN2C(=CSC2=N1)C3=CC=CS3</chem>                    | 0.91069<br>3 |
| iRNF130-7  | CSC027016462 | <chem>NC(=O)CN1C=NC=2C(Br)=CC(Br)=CC2C1=O</chem>             | 0.92452<br>2 |
| iRNF130-8  | CSC050946457 | <chem>CCN(C1CC1)C(=O)C=2C=C3C=CC=CC3=CC2O</chem>             | 0.93983<br>8 |
| iRNF130-9  | CSC005473254 | <chem>NC(=O)CN(CC=1N=NSC1Cl)C2CCCC2</chem>                   | 0.93447<br>6 |
| iRNF130-10 | CSC027016806 | <chem>COC=1C=CC(NC(=O)[C@H](C)NC(=O)N)=CC1Cl</chem>          | 0.93562<br>6 |
| iRNF130-11 | CSC026133553 | <chem>CC=1C=CC=C(NC(=O)C=2C=CC(F)=CC2F)C1C(=O)N3CCCC3</chem> | 0.91360<br>4 |
| iRNF130-12 | CSC000695152 | <chem>NS(=O)(=O)CC=1C=CC(Cl)=CC1Br</chem>                    | 0.95821<br>6 |
| iRNF130-13 | CSC026421030 | <chem>CCOC(=O)CNC(=O)[C@@H]1CCCC[C@H]1C(=O)NCC(=O)OCC</chem> | 0.93724<br>7 |
| iRNF130-14 | CSC026225287 | <chem>CN(CC(=O)NC1CC1)S(=O)(=O)C2=CC=C(Cl)S2</chem>          | 0.93537<br>7 |
| iRNF130-15 | CSC028301548 | <chem>CC1CN(C)CCC1N(C)C(=O)NC=2C=CC=C3CCN(C(=O)C)C32</chem>  | 0.95914<br>9 |
| iRNF130-16 | CSC026948146 | <chem>O=C(OC1CCCCC1=O)C2CCCN(C2)C(=O)N3CCCC3</chem>          | 0.91656      |
| iRNF130-17 | CSC028329293 | <chem>COC[C@@H](O)CSC1=NN=C(O1)C2=CC=C(Cl)S2</chem>          | 0.90682<br>5 |
| iRNF130-18 | CSC028247587 | <chem>Cl.CNCC(=O)NC1=NC=C(CC=2C=CC=C(Br)C2)S1</chem>         | 0.91530<br>4 |
| iRNF130-19 | CSC028262172 | <chem>O=C(NC=1C=CC=C(Cl)N2C(=O)CCNC2=O)C=3C=CN=CC3</chem>    | 0.90752<br>2 |
| iRNF130-20 | CSC025845312 | <chem>CCN(CC1CCOC1)C(=O)NC2=NN=C(S2)C3CC3</chem>             | 0.92134<br>6 |
| iRNF130-21 | CSC027048354 | <chem>CNC=1SN=C(C)C1C(=O)N2CCN(CC2)C3CC3</chem>              | 0.93481      |
| iRNF130-22 | CSC025905910 | <chem>NC(=O)C1CCN(C1)C(=O)C=2NC=3C=CC(Cl)=CC3C2Cl</chem>     | 0.97958<br>9 |
| iRNF130-23 | CSC026577280 | <chem>CCN(C1CC1)C(=O)CC2=CSC(=N2)N3CCNC3=O</chem>            | 0.94915<br>7 |
| iRNF130-24 | CSC027051961 | <chem>CCC(=O)N1CCCC(C1)C(=O)C(C#N)C2=NC=3C=CC=CC3O2</chem>   | 0.90786<br>5 |
| iRNF130-25 | CSC026172021 | <chem>CC(C)C(=O)NC1CCN(CC1)C=2C=CC=C(Cl)C2C#N</chem>         | 0.92620<br>5 |
| iRNF130-26 | CSC011440157 | <chem>COC=1C=CC=C(Cl)C(C)(C)C(=O)O</chem>                    | 0.92699<br>8 |
| iRNF130-27 | CSC138471901 | <chem>C[C@@H]1[C@@H](CCN1C=2C(C#N)=CC=CC2C#N)N3CCOCC3</chem> | 0.90822<br>7 |
| iRNF130-28 | CSC138481699 | <chem>CC1=NN(C)C(Cl)=C1C2CCCN2C(=O)C=3C=CNC3C</chem>         | 0.91662<br>2 |

|            |              |                                                          |          |
|------------|--------------|----------------------------------------------------------|----------|
| iRNF130-29 | CSC003364705 | OC(=O)[C@H]1CCCN1C(=O)CC=2C=CC=CC2Cl                     | 0.923714 |
| iRNF130-30 | CSC027664897 | C[C@@H]1CN(CCN1C=2C(F)=CC(C#N)=CC2F)C3CCOCC3             | 0.91084  |
| iRNF130-31 | CSC001658573 | CC(C)[C@H](NC(=O)C=1C=CC(Cl)=CC1Br)C(=O)O                | 0.943321 |
| iRNF130-32 | CSC116244659 | CN1[C@H]2CCN(C[C@H]2NC1=O)C=3C(C#N)=CC=CC3C#N            | 0.924902 |
| iRNF130-33 | CSC000730120 | NC1=NC=2CCSCC2S1                                         | 0.933829 |
| iRNF130-34 | CSC027557546 | CS(=O)(=O)CC1=NC(=CS1)C=2C=CC(Cl)=C(Cl)C2                | 0.964299 |
| iRNF130-35 | CSC026426474 | CS(=O)(=O)CCSC1=NN=C(CC=2C(F)=CC=CC2Cl)O1                | 0.969614 |
| iRNF130-36 | CSC027927782 | CS(=O)(=O)CCNC=1C=CN=C2C=CC(Cl)=CC12                     | 0.979682 |
| iRNF130-37 | CSC026485826 | C1CC1C=2N=C3CCCC3=C(SC4=NN=C(S4)N5CCCC5)N2               | 0.921147 |
| iRNF130-38 | CSC047400665 | CCN1CC[C@H]2OCCN([C@H]2C1)C(=O)C=3C(C)=NSC3NC4CC4        | 0.962463 |
| iRNF130-39 | CSC091063908 | OC(=O)[C@H]1CC[C@H](CNS(=O)(=O)C=2C=CC=CC2Cl)CC1         | 0.917425 |
| iRNF130-40 | CSC133099212 | O=C(N1CCCC1)C2=CC(=CN2)C(=O)N3CCC(=O)N4CCCC43            | 0.956596 |
| iRNF130-41 | CSC026251738 | CCOC(=O)CC(O)C(=O)NC1=NC=2C=CC(OCC)=CC2S1                | 0.907779 |
| iRNF130-42 | CSC138472334 | Cl.C1C=1C=CC(OCC2=NOC(=N2)C3CCNC3)=C(Cl)C1               | 0.923604 |
| iRNF130-43 | CSC000748996 | OCCOC=1C(Cl)=CC(Cl)=CC1Cl                                | 0.90701  |
| iRNF130-44 | CSC026832714 | FC=1C=CC(=CC1)C=2N=NN(CC(=O)N(C3CC3)C4=CCCC4)N2          | 0.923135 |
| iRNF130-45 | CSC028202369 | CCCOC(=O)CC1N2C=NC=3C=CC=CC3C2=NNC1=O                    | 0.935704 |
| iRNF130-46 | CSC026136920 | CN1C=CSC1=NC(=O)CC=2C(F)=CC=CC2Cl                        | 0.92655  |
| iRNF130-47 | CSC027592993 | CCCN(C1CC1)C=2C=NN(C)C(=O)C2Cl                           | 0.930918 |
| iRNF130-48 | CSC102901596 | CCS(=O)(=O)CC1=NN=C(O1)C=2C=CC(Cl)=CC2Cl                 | 0.963349 |
| iRNF130-49 | CSC138555307 | ClC=1C=CC=C(C1Cl)N2C=C(CNS(=O)(=O)C3CC3)N=N2             | 0.971893 |
| iRNF130-50 | CSC026917642 | CC1OC=2C=CC=CC2N(CCC(=O)N3CCCC3C(=O)O)C1=O               | 0.973929 |
| iRNF130-51 | CSC026445996 | C[C@H](NS(=O)(=O)CC=1C=CC(F)=CC1C)C=2C=CC(Cl)=CN2        | 0.921103 |
| iRNF130-52 | CSC027388000 | CCNC1=NN=C(SCC2=CSC(CC)=N2)S1                            | 0.94425  |
| iRNF130-53 | CSC025996325 | CCC=1ON=C(C)C1C(=O)N2CCC[C@H](CN3CCOCC3)C2               | 0.924901 |
| iRNF130-54 | CSC028347013 | COC=1C=C(CC(C)NC=2C=CC(C)=C(NS(=O)(=O)C)C2)C=CN1         | 0.933109 |
| iRNF130-55 | CSC027527646 | COC=1C(Cl)=CC(=CC1Cl)C(=O)N2CCC[C@@H]2C(=O)O             | 0.938295 |
| iRNF130-56 | CSC027633161 | CNS(=O)(=O)C=1C=CC(=CN1)C(=O)N2CCC2C(C)C                 | 0.924793 |
| iRNF130-57 | CSC133022628 | CN1CCOCC1C=2C(C)=NN(CC3=NC=C(Cl)S3)C2C                   | 0.925013 |
| iRNF130-58 | CSC138453579 | CO[C@@H]1C[C@H](N(CC=2C=CC(F)=C(C#N)C2Cl)C1)C3=NC(C)=NN3 | 0.911173 |

|            |              |                                                            |          |
|------------|--------------|------------------------------------------------------------|----------|
| iRNF130-59 | CSC138468896 | CN1N=CC=C1CN2C[C@@H](F)C[C@H]2CNC=3N=CN=C(N)C3Cl           | 0.918375 |
| iRNF130-60 | CSC138507995 | NC[C@@H]1CCO[C@@H]1C2=NC(COC=3C=CC=C(Cl)C3Cl)=NO2          | 0.935445 |
| iRNF130-61 | CSC093238781 | CC1=NN=C(NC(=O))[C@@H]2CCCO[C@H]2C=3C=NN(C)C3)N1C4CC4      | 0.932432 |
| iRNF130-62 | CSC133047083 | COC=1C=CC(=CC1OC)C2=NOC(=N2)C3=CSC(CCN)=N3                 | 0.917672 |
| iRNF130-63 | CSC138461036 | CS(=O)(=O)C1=NN=C(CN2C3CCC2C=C(C3)C=4C=CC=CC4)S1           | 0.94284  |
| iRNF130-64 | CSC046486202 | FC=1C(NC(=O)N2CN(CC3CC3)C(=O)C2)=CC=C4CNCCCC14             | 0.914966 |
| iRNF130-65 | CSC105262941 | CC1=NN=C2CN(C(CN12)C(=O)N)C(=O)C=3C=C(F)C=C(Cl)C3          | 0.907588 |
| iRNF130-66 | CSC133029451 | FC=1C=C(C=CC1Cl)[C@@H]2C[C@H]2NS(=O)(=O)CCN3C=NN=N3        | 0.97345  |
| iRNF130-67 | CSC060886144 | CCC1N(CCN(CC)C1=O)C(=O)CNC(=O)NC                           | 0.927963 |
| iRNF130-68 | CSC133100711 | OCC1CCN(C1)C2=NC=3C(F)=CC(Br)=CC3S2                        | 0.948409 |
| iRNF130-69 | CSC116286215 | CCN(CC)C(=O)N1CC2=NN(C)C=C2C1C(=O)OC                       | 0.972135 |
| iRNF130-70 | CSC133102217 | COC(C1CC1)C(=O)N2CC(=O)NC=3C=C(F)C(F)=CC23                 | 0.914191 |
| iRNF130-71 | CSC059178943 | CCC=1N=CN=C(N2CCC(C2)C(=O)N)C1F                            | 0.938818 |
| iRNF130-72 | CSC073125466 | COC=1C=C2CCN(CC=3C=C4CCCCN4N3)C(CC(=O)O)C2=CC1OC           | 0.914232 |
| iRNF130-73 | CSC133146861 | COC(=O)C1=C(NC(=O)NC2CCCCC2C)N=C3CCCN13                    | 0.916407 |
| iRNF130-74 | CSC133052583 | COC=1C=CC=2C(=NC=NC2C1F)N3CC[C@H]([C@H]3C)N(C)CCO          | 0.922464 |
| iRNF130-75 | CSC138501138 | CN(C)[C@@H]1CN(CC=2C=CC=C(C#N)C2F)C[C@@H]1N3C=CN=N3        | 0.956617 |
| iRNF130-76 | CSC046871874 | FC=1C=C(C=C(F)C1N2CCOCC2)C3=NC(=NO3)C4CN5CCN4CC5           | 0.936864 |
| iRNF130-77 | CSC133144120 | COC=1C=C(Br)C=C(CNC(=O)[C@@H]2C[C@@H]2C(=O)N)C1 &1:12,14,r | 0.923758 |
| iRNF130-78 | CSC133035245 | NCC1N(CCC=2C=CC=CC12)C(=O)[C@@H]3C[C@H]3C(=O)O &1:14,16,r  | 0.923943 |
| iRNF130-79 | CSC102895837 | O=C(NS(=O)(=O)C=1C=CSC1)[C@@H]2C[C@H]2C3CCC3 &1:11,13,r    | 0.912382 |
| iRNF130-80 | CSC116286621 | CC[C@@H]1OCC[C@H]1NC=2N=C(N)C(Br)=C(Cl)N2 &1:2,6,r         | 0.921413 |
| iRNF130-81 | CSC000601731 | COC=1C=CC(Cl)=CC1C(=O)N2CCCC2C(=O)O                        | 0.920031 |
| iRNF130-82 | CSC026394025 | CNS(=O)(=O)C=1C=CC=C(CNC=2C=CC=C(F)C2C#N)C1                | 0.976423 |
| iRNF130-83 | CSC000749597 | COC=1C=C(OC)C(=CC1Cl)[C@H](C)O                             | 0.962979 |
| iRNF130-84 | CSC026808114 | CCN(CC=1C=CC(Cl)=C(Cl)C1)C(=O)[C@@H]2CCCN2C(=O)N           | 0.973936 |
| iRNF130-85 | CSC028327045 | CCCC1=NN=C(SC=2C=C(OCC)N=CN2)O1                            | 0.917031 |
| iRNF130-86 | CSC025728025 | Cl.FC(F)(F)C1=NC(=NO1)C2CCCNC2                             | 0.917127 |

**Supplementary Tab 11. Ranking result of TransformerCPI2.0 and other tools screening the same compound library against RNF130.**

| <b>Method</b>            | <b>iRNF130-63 ranking</b>  |
|--------------------------|----------------------------|
| <b>TransformerCPI2.0</b> | 3,510/981,244, Top 0.4%    |
| <b>TransformerCPI</b>    | 65,987/981,244, Top 6.7%   |
| <b>GraphDTA</b>          | 189,247/981,244, Top 19.3% |
| <b>GCN</b>               | 384,498/981,244, Top 39.2% |

**Supplementary Tab 12. Rabeprazole target prediction.**

| Rank | Gene    | Uniprot ID | Description                                           | Score    |
|------|---------|------------|-------------------------------------------------------|----------|
| 1    | ITPR1   | Q14643     | Inositol 1,4,5-trisphosphate receptor type 1          | 0.998982 |
| 2    | FBP1    | P09467     | Fructose-1,6-bisphosphatase 1                         | 0.998867 |
| 3    | ACACB   | O00763     | Acetyl-CoA carboxylase 2                              | 0.998795 |
| 4    | ITPR3   | Q14573     | Inositol 1,4,5-trisphosphate receptor type 3          | 0.998475 |
| 5    | ITPR2   | Q14571     | Inositol 1,4,5-trisphosphate receptor type 2          | 0.998127 |
| 6    | ABCA1   | O95477     | ATP-binding cassette sub-family A member 1            | 0.997757 |
| 7    | ABCC8   | Q09428     | ATP-binding cassette sub-family C member 8            | 0.995798 |
| 8    | CHAT    | P28329     | Choline O-acetyltransferase                           | 0.994322 |
| 9    | POLE    | Q07864     | DNA polymerase epsilon catalytic subunit A            | 0.994208 |
| 10   | ARL2    | P36404     | ADP-ribosylation factor-like protein 2                | 0.993315 |
| 11   | LRRK2   | Q5S007     | Leucine-rich repeat serine/threonine-protein kinase 2 | 0.989988 |
| 12   | UTRN    | P46939     | Utrophin                                              | 0.98867  |
| 13   | ARF1    | P84077     | ADP-ribosylation factor 1                             | 0.988254 |
| 14   | ABCC5   | O15440     | Multidrug resistance-associated protein 5             | 0.98686  |
| 15   | C3      | P01024     | Complement C3                                         | 0.986474 |
| 16   | HTT     | P42858     | Huntingtin                                            | 0.986395 |
| 17   | EPRS    | P07814     | Bifunctional glutamate/proline--tRNA ligase           | 0.983021 |
| 18   | EIF2AK4 | Q9P2K8     | eIF-2-alpha kinase GCN2                               | 0.982954 |
| 19   | ABCC9   | O60706     | ATP-binding cassette sub-family C member 9            | 0.982515 |
| 20   | TAOK3   | Q9H2K8     | Serine/threonine-protein kinase TAO3                  | 0.981002 |

**Supplementary Tab 13. Lansoprazole target prediction.**

| Rank | Gene    | Uniprot ID | Description                                           | Score    |
|------|---------|------------|-------------------------------------------------------|----------|
| 1    | FBP1    | P09467     | Fructose-1,6-bisphosphatase 1                         | 0.999822 |
| 2    | ITPR1   | Q14643     | Inositol 1,4,5-trisphosphate receptor type 1          | 0.998049 |
| 3    | MAP3K19 | Q56UN5     | Mitogen-activated protein kinase kinase kinase 19     | 0.997066 |
| 4    | ITPR2   | Q14571     | Inositol 1,4,5-trisphosphate receptor type 2          | 0.996896 |
| 5    | ARL2    | P36404     | ADP-ribosylation factor-like protein 2                | 0.996651 |
| 6    | ARF1    | P84077     | ADP-ribosylation factor 1                             | 0.996253 |
| 7    | ITPR3   | Q14573     | Inositol 1,4,5-trisphosphate receptor type 3          | 0.996161 |
| 8    | LRRK2   | Q5S007     | Leucine-rich repeat serine/threonine-protein kinase 2 | 0.996034 |
| 9    | ABCC8   | Q09428     | ATP-binding cassette sub-family C member 8            | 0.995469 |
| 10   | ACACB   | O00763     | Acetyl-CoA carboxylase 2                              | 0.995447 |
| 11   | F8      | P00451     | Coagulation factor VIII                               | 0.995162 |
| 12   | ABCA1   | O95477     | ATP-binding cassette sub-family A member 1            | 0.994401 |
| 13   | HDAC4   | P56524     | Histone deacetylase 4                                 | 0.994142 |
| 14   | ABCC5   | O15440     | Multidrug resistance-associated protein 5             | 0.99354  |
| 15   | ATM     | Q13315     | Serine-protein kinase ATM                             | 0.991644 |
| 16   | ALK     | Q9UM73     | ALK tyrosine kinase receptor                          | 0.990803 |
| 17   | NUCB1   | Q02818     | Nucleobindin-1                                        | 0.988412 |
| 18   | HSD17B3 | P37058     | Testosterone 17-beta-dehydrogenase 3                  | 0.988405 |
| 19   | KCNH8   | Q96L42     | Potassium voltage-gated channel subfamily H member 8  | 0.988265 |
| 20   | C4A     | P0C0L4     | Complement C4-A                                       | 0.988112 |



### Supplementary Tab 14. Omeprazole target prediction.

| Rank | Gene    | Uniprot ID | Description                                                                    | Score    |
|------|---------|------------|--------------------------------------------------------------------------------|----------|
| 1    | PLD1    | Q13393     | Phospholipase D1                                                               | 0.997618 |
| 2    | FBP1    | P09467     | Fructose-1,6-bisphosphatase 1                                                  | 0.997351 |
| 3    | MAP3K19 | Q56UN5     | Mitogen-activated protein kinase kinase kinase 19                              | 0.997184 |
| 4    | DGKZ    | Q13574     | Diacylglycerol kinase zeta                                                     | 0.996634 |
| 5    | ITPR1   | Q14643     | Inositol 1,4,5-trisphosphate receptor type 1                                   | 0.996055 |
| 6    | ROS1    | P08922     | Proto-oncogene tyrosine-protein kinase ROS                                     | 0.995868 |
| 7    | ARF1    | P84077     | ADP-ribosylation factor 1                                                      | 0.995269 |
| 8    | ACACB   | O00763     | Acetyl-CoA carboxylase 2                                                       | 0.994592 |
| 9    | PIK3CD  | O00329     | Phosphatidylinositol 4,5-bisphosphate 3-kinase catalytic subunit delta isoform | 0.994178 |
| 10   | ALK     | Q9UM73     | ALK tyrosine kinase receptor                                                   | 0.992792 |
| 11   | ITPR3   | Q14573     | Inositol 1,4,5-trisphosphate receptor type 3                                   | 0.992778 |
| 12   | ARL2    | P36404     | ADP-ribosylation factor-like protein 2                                         | 0.992654 |
| 13   | MAST1   | Q9Y2H9     | Microtubule-associated serine/threonine-protein kinase 1                       | 0.992632 |
| 14   | MST1R   | Q04912     | Macrophage-stimulating protein receptor                                        | 0.9925   |
| 15   | PDE10A  | Q9Y233     | cAMP and cAMP-inhibited cGMP 3',5'-cyclic phosphodiesterase 10A                | 0.991689 |
| 16   | KDM5D   | Q9BY66     | Lysine-specific demethylase 5D                                                 | 0.99144  |
| 17   | MYLK    | Q15746     | Myosin light chain kinase, smooth muscle                                       | 0.991346 |
| 18   | C4A     | P0C0L4     | Complement C4-A                                                                | 0.990324 |
| 19   | LIG1    | P18858     | DNA ligase 1                                                                   | 0.989881 |
| 20   | GAK     | O14976     | Cyclin-G-associated kinase                                                     | 0.989778 |

**Supplementary Tab 15. Pantoprazole target prediction.**

| Rank | Gene    | Uniprot ID | Description                                              | Score    |
|------|---------|------------|----------------------------------------------------------|----------|
| 1    | ITPR1   | Q14643     | Inositol 1,4,5-trisphosphate receptor type 1             | 0.996287 |
| 2    | EPRS    | P07814     | Bifunctional glutamate/proline--tRNA ligase              | 0.994877 |
| 3    | EDNRA   | P25101     | Endothelin-1 receptor                                    | 0.994638 |
| 4    | ITPR2   | Q14571     | Inositol 1,4,5-trisphosphate receptor type 2             | 0.994003 |
| 5    | STK10   | O94804     | Serine/threonine-protein kinase 10                       | 0.993642 |
| 6    | ALK     | Q9UM73     | ALK tyrosine kinase receptor                             | 0.992905 |
| 7    | GAK     | O14976     | Cyclin-G-associated kinase                               | 0.992869 |
| 8    | MAP3K11 | Q16584     | Mitogen-activated protein kinase kinase kinase 11        | 0.991866 |
| 9    | KDM5D   | Q9BY66     | Lysine-specific demethylase 5D                           | 0.99125  |
| 10   | C3      | P01024     | Complement C3                                            | 0.989104 |
| 11   | MAP3K9  | P80192     | Mitogen-activated protein kinase kinase kinase 9         | 0.988459 |
| 12   | MAST1   | Q9Y2H9     | Microtubule-associated serine/threonine-protein kinase 1 | 0.987881 |
| 13   | PLK2    | Q9NYY3     | Serine/threonine-protein kinase PLK2                     | 0.987577 |
| 14   | ABCC8   | Q09428     | ATP-binding cassette sub-family C member 8               | 0.987273 |
| 15   | TYK2    | P29597     | Non-receptor tyrosine-protein kinase TYK2                | 0.986807 |
| 16   | STK3    | Q13188     | Serine/threonine-protein kinase 3                        | 0.986787 |
| 17   | ROS1    | P08922     | Proto-oncogene tyrosine-protein kinase ROS               | 0.986765 |
| 18   | DNMT1   | P26358     | DNA (cytosine-5)-methyltransferase 1                     | 0.986613 |
| 19   | ARF1    | P84077     | ADP-ribosylation factor 1                                | 0.98628  |
| 20   | C4A     | P0C0L4     | Complement C4-A                                          | 0.98627  |

**Supplementary Tab 16. Tanimoto similarity between PPIs and three known ARF1 inhibitors calculated by ECFP fingerprints.**

|                     | <b>AMF-26</b> | <b>Brefeldin A</b> | <b>LM-11</b> |
|---------------------|---------------|--------------------|--------------|
| <b>Rabeprazole</b>  | 0.101         | 0.047              | 0.082        |
| <b>Lansoprazole</b> | 0.102         | 0.048              | 0.083        |
| <b>Omeprazole</b>   | 0.102         | 0.048              | 0.071        |
| <b>Pantoprazole</b> | 0.108         | 0.045              | 0.067        |

**Supplementary Tab 17. Prediction scores of PPIs with ARF1 predicted by TransformerCPI2.0 and baseline models.**

| <b>Methods</b>           | <b>Omeprazole</b> | <b>Rabeprazole</b> | <b>Lansoprazole</b> | <b>Pantoprazole</b> |
|--------------------------|-------------------|--------------------|---------------------|---------------------|
| <b>TransformerCPI2.0</b> | 0.995             | 0.988              | 0.996               | 0.986               |
| <b>TransformerCPI</b>    | 0.936             | 0.964              | 0.929               | 0.952               |
| <b>GraphDTA</b>          | 0.007             | 0.054              | 0.154               | 0.013               |
| <b>GCN</b>               | 0.025             | 0.018              | 0.007               | 0.018               |

**Supplementary Tab 18. Atomic features of TransformerCPI2.0.**

|                                          |                                       |
|------------------------------------------|---------------------------------------|
| <b>Atom type</b>                         | C,N,O,F,P,S,Cl,Br,I,other (one hot)   |
| <b>Degree of atom</b>                    | 0,1,2,3,4,5,6 (one hot)               |
| <b>Formal charge</b>                     | 0 or 1                                |
| <b>Number of radical electrons</b>       | 0 or 1                                |
| <b>Hybridization Type</b>                | sp,sp2,sp3,sp3d,sp3d2,other (one hot) |
| <b>Aromatic</b>                          | 0 or 1                                |
| <b>Number of hydrogen atoms attached</b> | 0,1,2,3,4 (one hot)                   |
| <b>Chirality</b>                         | 0(False) or 1(True)                   |
| <b>Configuration</b>                     | R,S (one hot)                         |
